# 1 Cross-species functional modules link proteostasis to human 2 normal aging

3 **Andrea Komljenovic<sup>1,2</sup>, Hao Li<sup>3</sup>, Vincenzo Sorrentino<sup>3</sup>, Zoltán Kutalik<sup>2,4</sup>, Johan**  
4 **Auwerx<sup>3</sup>, Marc Robinson-Rechavi<sup>1,2\*</sup>**

5  
6 <sup>1</sup>Department of Ecology and Evolution, University of Lausanne, Lausanne, Switzerland

7 <sup>2</sup>Swiss Institute of Bioinformatics, Lausanne, Switzerland

8 <sup>3</sup>Laboratory of Integrative Systems Physiology, EPFL, Lausanne, Switzerland

9 <sup>4</sup>Institute of Social and Preventive Medicine (IUMSP), Lausanne University Hospital, Lausanne  
10 1010, Switzerland

11

12

13 \*Correspondence author: [marc.robinson-rechavi@unil.ch](mailto:marc.robinson-rechavi@unil.ch)

14

15 Running title: Conserved functional modules link proteostasis to aging

16

## 17 Abstract

18

19 The evolutionarily conserved nature of the few well-known anti-aging interventions that  
20 affect lifespan, such as caloric restriction, suggests that aging-related research in model  
21 organisms is directly relevant to human aging. Since human lifespan is a complex trait, a  
22 systems-level approach will contribute to a more comprehensive understanding of the  
23 underlying aging landscape. Here, we integrate evolutionary and functional information  
24 of normal aging across human and model organisms at three levels: gene-level,  
25 process-level, and network-level. We identify evolutionarily conserved modules of  
26 normal aging across diverse taxa, and importantly, we show that proteostasis  
27 involvement is conserved in healthy aging. Additionally, we find that mechanisms related  
28 to protein quality control network are enriched in 22 age-related genome-wide  
29 association studies (GWAS) and are associated to caloric restriction. These results  
30 demonstrate that a systems-level approach, combined with evolutionary conservation,  
31 allows the detection of candidate aging genes and pathways relevant to human normal  
32 aging.

## 33 Highlights

- 34
- Normal aging is evolutionarily conserved at the module level.

- 35 • Core pathways in healthy aging are related to mechanisms of protein quality  
36 network
- 37 • The evolutionarily conserved pathways of healthy aging react to caloric  
38 restriction.
- 39 • Our integrative approach identifies evolutionarily conserved functional modules  
40 and showed enrichment in several age-related GWAS studies.

41

## 42 Introduction

43 Aging is a process that affects all living organisms and results in a progressive decline in  
44 life function and a gain in vulnerability to death (Jones *et al.*, 2014). In humans, aging is  
45 the main risk factor in a wide spectrum of diseases. The recent increase in human  
46 healthspan, also called ‘normal’, ‘disease-free’, or ‘healthy’ aging, is mostly due to  
47 improved medical care and sanitation (Greene, 2001; Rappuoli *et al.*, 2011).

48

49 Major strides have been made in understanding the main molecular pathways  
50 underpinning the aging phenotype, leading to the definition of a number of "hallmarks" of  
51 aging, that may be common between species (López-Otín *et al.*, 2013). Mitochondrial  
52 dysfunction and loss of proteostasis are two such conserved hallmarks of aging. Indeed,  
53 many comparative studies have shown mitochondrial dysfunction as a common feature  
54 of aging across species. Shared gene signatures in aging of *D. melanogaster* and *C.*  
55 *elegans* are linked to mitochondrial oxidative respiration, and similar results are  
56 observed in primates, including humans (McCarroll *et al.*, 2004; de Magalhães, Curado  
57 and Church, 2009; Alexey A. Fushman *et al.*, 2015). Collapse of proteostasis is another  
58 hallmark of aging that was shown to be important not only in short-lived species, but also  
59 in long-lived ones (Tian, Seluanov and Gorbunova, 2017). Loss of proteostasis is related  
60 to major human pathologies, such as Alzheimer’s and Parkinson’s disease, offering an  
61 opportunity to detect conserved candidate genes important in those age-related  
62 diseases (Labbadia and Morimoto, 2015; Sorrentino *et al.*, 2017). The proteostasis  
63 network consists of three major mechanisms: protein synthesis, autophagy and the  
64 proteasome complex (Kaushik and Cuervo, 2015). Recent studies on the long-lived  
65 naked mole rat showed maintenance of proteasome activity throughout life (Rodriguez *et al.*,  
66 2012). Perturbations of components of the proteostasis network have already been  
67 observed in other species, such as mice (Pyo *et al.*, 2013). Notably, caloric restriction,  
68 defined as a reduction of regular caloric intake by 20-40%, extends lifespan and delays  
69 the onset of age-related diseases in many species (Lee *et al.*, 2006; Selman and  
70 Hempenstall, 2012; Bass *et al.*, 2015; Mattison *et al.*, 2017), in part through effects on  
71 mitochondria and proteostatic networks.

72

73 Although significant efforts have been made to uncover the identity of genes and  
74 pathways that affect lifespan, it is unclear to what extent the functional information of  
75 aging obtained from model organisms can contribute to human aging. Focusing on the  
76 process of aging in healthy individuals should improve the discovery of pathways  
77 important in natural aging. In addition, systems-level analysis of large datasets has  
78 emerged as an important tool for identifying relevant molecular mechanisms, as single  
79 gene-based methods are not sufficient to elucidate complex processes such as aging.  
80 The integration of various data types contributes to identify pathways and marker genes  
81 associated with specific phenotypes (Baumgart *et al.*, 2016; Hasin, Seldin and Lusic,  
82 2017). Notably, co-expression network analyses can help to elucidate the underlying  
83 mechanisms of various complex traits (Xue *et al.*, 2007; van Dam *et al.*, 2017).

84

85 To incorporate evolutionary and functional age-related information, we integrated  
86 transcriptome profiles of four animal species from young and old adults: *H. sapiens*, *M.*  
87 *musculus*, *D. melanogaster* and *C. elegans*. As a source of gene expression, we used  
88 human data from the large-scale Genotype-Tissue expression (GTEx) project (Mele *et*  
89 *al.*, 2015), together with aging transcriptomes of model organisms. We identified the  
90 functional levels of conserved genetic modifiers important during normal aging, and  
91 related them to caloric restriction experiments and enrichments in age-related genome-  
92 wide association studies (GWAS). We used gene families as evolutionary information  
93 across distant species in a two-step approach to observe age-related conserved  
94 mechanisms. Our results show the contribution of age-related mechanisms from model  
95 organisms to human normal aging, with notably a demonstration of the conserved role of  
96 proteostasis in normal aging and in the reaction to dietary restriction.

## 97 Results

### 98 Data-driven integrative evolutionary approach to healthy aging

99 We used a three steps-approach to integrate transcriptomes across distant species  
100 (human and model organisms) and to identify evolutionarily conserved mechanisms in  
101 normal aging (Figure 1A). In the first step, we performed differential expression analysis  
102 between young and old samples in two tissues, skeletal muscle and hippocampus, from  
103 humans (*Homo sapiens*) and mice (*Mus musculus*), and in whole body for the fly  
104 (*Drosophila melanogaster*) and the worm (*Caenorhabditis elegans*). We also used  
105 transcriptome datasets related to caloric restriction in these species for validation. In the  
106 second step, we obtained 3232 orthologous sets of genes, ‘orthogroups’, across those  
107 four species (see Methods). Each orthogroup (OG) is defined as the set of the  
108 orthologous and paralogous genes that descended from a single ancestral gene in the  
109 last common ancestor to those four species (*H. sapiens*, *M. musculus*, *D. melanogaster*,  
110 *C. elegans*) and an outgroup species (*Amphimedon queenslandica*). Each orthogroup  
111 can contain a different number of genes, and was treated as a single functional meta-  
112 gene common to four species. We corrected for the orthogroup sizes by applying  
113 Bonferroni correction on the gene p-values from differential expression analysis within  
114 the orthogroup. Then, we selected a representative gene per species within orthogroups.  
115 We took the minimum Bonferroni adjusted p-value of a species-specific age-related  
116 gene from differential expression analysis. This allowed us to build ‘age-related  
117 homologous quadruplets’ (see Details in Figure S1A). The four p-values within each  
118 quadruplet were then summarized into a single p-value per quadruplet, by using Fisher’s  
119 combined test. We obtained 2511 gene quadruplets in skeletal muscle, 2800 in  
120 hippocampus, and 1971 in caloric restriction experiments (Table S4). We characterized  
121 their biological relevance by functional enrichment. In the third and final step, those  
122 quadruplets of age-related genes were used to build a co-expression network per  
123 species (Figure S1B). These networks were then integrated together using order  
124 statistics into one cross-species age-related network. We performed community search  
125 algorithm on this network to obtain age-related and evolutionarily conserved modules.  
126 The modules were then tested for functional enrichment and for enrichment in GWAS  
127 hits.

128

### 129 Age-related gene expression patterns in four species

130 To study normal aging, we restricted ourselves to transcriptomic studies with at least one  
131 young adult and one old adult time-point, adult being defined as after sexual maturity  
132 (Figure 1B). Transcriptomes had to come from control samples (model organism  
133 datasets) or relatively healthy individuals (GTEx dataset). We defined young and old  
134 adults across species as follows: young: 3-4 months for *M. musculus*, 2-10 days for *D.*  
135 *melanogaster*, 3-6 days for *C. elegans*; old: 18-24 months for *M. musculus*, 20-50 days  
136 for *D. melanogaster*, 10-15 days for *C. elegans*. For the GTEx data, samples from all  
137 adults (20-70 years old) were taken into account in a linear model to detect differentially  
138 expressed genes. In human and mouse, we focused on two tissues, skeletal muscle and  
139 hippocampus, because they are known to be profoundly affected by aging. During aging,  
140 skeletal muscle is affected by sarcopenia (Marzetti and Leeuwenburgh, 2006). Changes

141 in hippocampus function have a significant impact on the memory performances in  
142 elderly people (Driscoll *et al.*, 2003). Thus both tissues are susceptible to aging-related  
143 diseases. For human, we used transcriptomes of 361 samples from skeletal muscle  
144 tissue and 81 samples from hippocampus from GTEx V6p. For the other species we  
145 used diverse publicly available transcriptomic datasets (Table S1). The sample sizes for  
146 model organisms were variable, from 3 to 6 replicates per time-point. In order to  
147 compare samples between young and old age groups, we fitted linear regression models  
148 for each dataset. In addition, in the GTEx dataset we controlled for covariates and  
149 hidden confounding factors to identify genes whose expression is correlated or anti-  
150 correlated with chronological age, taking into account all samples (see Methods).

151  
152 We observed uneven distributions of up- and down-regulated genes with aging across  
153 different species and datasets (Figure 1C, Table S2), suggesting variable responses to  
154 aging and different power of datasets. The human hippocampus shows substantially  
155 more age-related gene expression change than skeletal muscle (6083 vs. 5053  
156 differentially expressed genes, FDR < 0.1). However, mouse hippocampus shows less  
157 gene expression change than skeletal muscle (1639 vs. 2455 differentially expressed  
158 genes, FDR < 0.1). These differences are due in part to the smaller sample size of the  
159 mouse skeletal muscle study. We limited our analysis to genes that were expressed in at  
160 least one age group, leading to detection of 15-40 % of genes that exhibits age-related  
161 gene expression changes. Of note, these changes are often very small, typically less  
162 than 1.05 fold in humans and less than 2-fold in animal models.

163  
164 It has been previously reported that there is a small overlap of differentially expressed  
165 genes among aging studies (de Magalhães, Curado and Church, 2009; Yang *et al.*,  
166 2015). To make results easily comparable across species, the young and old adults of  
167 one species should correspond to young and old adults of another species (Flurkey, M.  
168 Curren and Harrison, 2007). Our clustering shows good consistency across age groups  
169 of samples between species, based on one-to-one orthologous genes with significant  
170 age variation (FDR < 0.05) (Figure 2A, Figure S2). Yet there is a low overlap of one-to-  
171 one orthologous genes with significant expression change in aging (Table S3). This  
172 observation is in line with two studies showing that the overlap between individual genes  
173 associated with aging did not reach the level of significance (Smith *et al.*, 2008; Alexey  
174 A. Fushan *et al.*, 2015). To go beyond this observation, we correlated log-transformed  
175 fold change (old/young; or log of  $\alpha$  age-related regression coefficient in human) between  
176 human and model organisms. We observed weak pairwise correlations (Figure S3)  
177 when comparing single genes. This indicates that most transcriptional changes on the  
178 gene level are species-specific, and that there is little evolutionary conservation to be  
179 found at this level.

180  
181

## 182 Cross-species integration at the process-level reveals proteostasis-linked age- 183 related mechanisms

184 To assess the age-related gene expression changes on a functional level in healthy  
185 individuals per species, we performed gene set enrichment analysis (GSEA)  
186 (Subramanian *et al.*, 2005) using gene ontology (GO) annotations (Gene Ontology  
187 Consortium *et al.*, 2000; The Gene Ontology Consortium, 2017). We then selected  
188 significant GO terms (FDR < 0.20) that we grouped into broader categories.



189

190 All species showed a general pattern of down-regulation of metabolic processes, such  
191 as mitochondrial translation (GO:0032543) in human GTEx skeletal muscle tissue,  
192 nucleotide metabolic process (GO:0009117) in mouse muscle tissue, cellular respiration  
193 (GO:0045333) in fly whole body, and oxoacid metabolic process (GO:0043436) in worm  
194 whole body (Figure S4). The pattern of metabolic down-regulation was stronger in  
195 muscle for both human and mouse. The processes that were down-regulated in  
196 hippocampus were related to behavior (GO:0007610), cognition (GO:0050980) and  
197 neurotransmitter secretion (GO:0007269) in human, and to synaptic signaling  
198 (GO:0099536) and axonogenesis (GO:0007409) in mouse. This confirms that there is a  
199 tissue-specific signal in normal aging. Due to small samples size of the mouse skeletal  
200 muscle dataset, we were able to detect only down-regulated metabolic processes. In  
201 addition to metabolism, we observe strong immune systems response to aging, such as  
202 regulation of cytokine production (GO:0001817) in human hippocampus or leukocyte-  
203 mediated immunity (GO:0002443) in mouse hippocampus. These results are consistent  
204 with known links between metabolism, immunity and aging (Lanna *et al.*, 2017).

205

206 We aggregated processes on the functional level across four species using evolutionary  
207 information to observe common age-related mechanisms rather than tissue-specific  
208 mechanisms. We integrated differential expression analysis from each species, as  
209 described above. We obtained 2010 genes in skeletal muscle / whole body, 2075 genes  
210 in hippocampus / whole body, and 1962 genes in caloric restriction experiments (Fisher  
211 combined tests, FDR < 0.10) (Table S4). We examined their biological relevance using  
212 Gene Ontology enrichment analysis (GEA) based on human annotation (Figure 2B). We  
213 did not take into account whether the processes that are shared across species are  
214 regulated in the same direction, but rather whether they are consistently perturbed  
215 during aging.

216

217 We obtained 100 significant GO terms (FDR < 0.05) related to biological processes, and  
218 aggregated them into broader GO categories. While our species-specific analysis mostly  
219 shows tissue-specific pathways, we found that terms with an evolutionarily conserved  
220 relation to normal aging are strongly enriched for processes involved in proteostasis, or  
221 protein homeostasis. The proteostasis-linked processes are more conserved than  
222 expected by chance (Figure S6). The other conserved processes are related to  
223 transport, translation, transcription and post-transcriptional modifications, and protein  
224 ubiquitination (Figure 2B, Table S5). We also confirmed previously known evolutionarily  
225 conserved age-related pathways, such as cellular respiration and immune response.  
226 Integrating caloric restriction datasets across the four species showed enrichments in  
227 similar processes (Figure 2B).

228

229 While most of the shared processes have been previously linked to aging, we focused  
230 on proteostasis and related processes. To characterize in more detail the specificity of  
231 proteostasis-linked processes, we investigated their enrichment strength in the large  
232 human GTEx dataset (Figure 2C). Since proteostasis perturbation is detected both  
233 through the GO domains of cellular localization and of biological process, we  
234 investigated these two domains, and obtained similar enrichments for both skeletal  
235 muscle (Figure 2C), and in hippocampus (Figure S6, Table S6). The most enriched  
236 cellular component terms in skeletal muscle were related to proteasome complex  
237 (GO:0000502, enrichment score: 1.99) and to mitochondrial matrix (GO:0005759,  
238 enrichment score: 1.38). We also observed strong enrichment of ribosomal large  
239 (GO:0000027, enrichment score: 1.57) and small subunit (GO:0000028, enrichment

240 score: 1.84), of protein homotetramerization (GO:0051289, enrichment score: 1.18), and  
241 of GO biological processes that are part of the protein quality control network. Overall,  
242 the translation and proteasome complexes appear to be the parts of the protein quality  
243 control network whose involvement in aging is both evolutionarily conserved across  
244 different species, and significantly enriched in human healthy aging. Interestingly, we  
245 also detect the mRNA splicing pathway as a part of the conserved processes between  
246 species.

247  
248 The direction of the changes in conserved proteostasis processes in humans is  
249 consistent with a relation between loss of proteostasis and healthy aging (Figure 3).  
250 Although macroautophagy did not show a strong enrichment score in the Figure 2C  
251 (GO:0016236, enrichment score: 0.90), there is down-regulation of the conserved genes  
252 associated with macroautophagy (Figure 3A), translation (Figure 3B), and the  
253 proteasome complex (Figure 3C), which are important in the protein quality network.  
254 Similar results are observed in hippocampus, although not with a strong signal as in  
255 skeletal muscle (Figure S7). The changes during healthy aging in both tissues are rather  
256 subtle but significant (Figure 3, Table S7).  
257

## 258 [Functional characterization of cross-species age-related network identifies](#) 259 [candidate genes related to healthy aging](#)

260 To characterize age-related processes at a systems-level and to prioritize conserved  
261 marker genes associated with normal aging, we constructed probabilistic networks.  
262 These were based on prioritization of co-expression links between conserved age-  
263 related genes across four species. These genes became nodes in the multi-species  
264 network. Thus the connections between the conserved age-related genes are based on  
265 evolutionary conservation, and prioritized according to the their co-expression in each  
266 species.

267  
268 Our integrative network analysis initially identified 20 and 14 modules for skeletal muscle  
269 and hippocampus, respectively. We randomized our networks 100 times based on the  
270 same number of conserved genes per experiment and obtained significantly higher  
271 numbers of gene-gene connections than in the original network (permutation test,  $p =$   
272  $0.0198$ ) (Figure S9). Thus aging networks appear to be lowly connected. We focused  
273 only on the modules larger than 10 genes; there were 12 such modules per tissue.  
274 These modules ranged in size from 16 (M7 hippocampus) to 191 genes (M12  
275 hippocampus) (Figure 4A and 4B, Table S8). The networks were summarized to module  
276 level (module as a node), and we observed strong inter-modular associations. This  
277 analysis provided several levels of information. First, it provided a small number of  
278 coherent gene modules that represent distinct transcriptional responses to aging,  
279 confirming the existence of a conserved modular system. Second, it detected conserved  
280 marker genes affected during aging, discussed below.

281  
282 To determine which of the conserved aging-associated modules are related to the main  
283 components of the proteostasis network, we carried out functional enrichment analysis  
284 on these modules, based on human gene annotations. The enrichments were highly  
285 significant for all modules ( $FDR < 0.01$ ), and confirmed the inter-modular associations  
286 (Table S8). Not all of the modules were related to proteostasis. Interestingly, M1, M10  
287 and M5 in the skeletal muscle network share strong associations with mitochondrion

288 organization and distribution, regulation of cellular amino acid metabolic process and  
289 ubiquitin protein catabolic process, while M2 and M3 in hippocampus share associations  
290 with different types of protein transport. Other modules (M1, M6, M7, M8, M11, M12 in  
291 skeletal muscle; M2, M3, M4, M5, M12 in hippocampus) support the impact of healthy  
292 aging on genes related to the proteostasis-linked processes. This included processes  
293 related to protein polyubiquitination (GO:0000209), translational initiation (GO:0006413),  
294 protein transport (GO:0015031), regulation of macroautophagy (GO:0016241), and  
295 proteasome-mediated ubiquitin-dependent protein catabolic process (GO:0043161). In  
296 skeletal muscle tissue there were also a strong enrichment in splicing process (M3).  
297 Moreover, the connection between M2, M10 and M6 in hippocampus, and between M1,  
298 M5 and M12 in skeletal muscle indicates that there is a connection between  
299 mitochondrial and proteostasis-related processes, recently shown to occur also in  
300 amyloid-beta proteotoxic diseases (Sorrentino *et al.*, 2017), and during mitochondrial  
301 stress (Labbadia and Morimoto, 2015; D 'amico, Sorrentino and Auwerx, 2017;  
302 Sorrentino, Menzies and Auwerx, 2018).

303  
304 To investigate the relevance of proteostasis-linked modules to age-related diseases, we  
305 performed enrichment analysis based on genes coming from 22 GWAS studies (See  
306 Methods, Table S9). M3, M4, M5 and M12 of skeletal muscle showed enrichment in  
307 coronary artery disease, triglycerides, 2hr glucose, multiple sclerosis and cholesterol-  
308 related diseases, while M4 and M6 of hippocampus showed enrichment in coronary  
309 artery disease and fasting proinsulin, respectively. Skeletal muscle module M12 is  
310 particularly interesting because its genes are not only enriched in GWAS studies but  
311 also have strong involvement in proteostasis (Figure S10A). Similarly, hippocampus  
312 module M4 is interesting due to enrichment in both GWAS and in one of the proteostasis  
313 processes (Figure 5B).

314  
315 To further characterize these modules, we studied how conserved modular genes  
316 associated with proteostasis and age-related GWAS diseases are changed in  
317 expression in humans, as a long-lived species. We looked deeper into the gene  
318 composition of two modules, M1 associated with SCF-dependent proteasomal ubiquitin-  
319 dependent protein catabolic process (79 genes) and M4 associated with positive  
320 regulation of telomerase RNA localization to Calaj body (155 genes) from the skeletal  
321 muscle and hippocampus networks, respectively. We defined network hubs, genes that  
322 exhibit a significantly high number of connections with other genes in the network, for  
323 each of these modules in muscle (Figure 5A, S10A) and hippocampus (Figure 5B,  
324 S10B). We focused on the hubs with the highest scores in each module and examined  
325 their neighborhood. The top ranked genes in M1 of the skeletal muscle were *CTSK*,  
326 *UBE2L3* and *CPA3* (Figure 5A). They are associated with protein quality network,  
327 related to protein degradation. Interestingly, the neighboring genes *PSMB2* and *PSMA1*  
328 are associated with the proteasome complex (Figure 5A). The top ranked genes in M4 in  
329 skeletal muscle were related to the translational initiation process, with *MAPRE3*,  
330 *SPTBN2* and *ATP6V0A1* as hub genes. Their network neighbors were tightly connected  
331 to the cytoskeleton and protein transportation (Figure 5B).

332  
333 Other modules also show links to metabolism and to proteostasis. For example muscle  
334 module M12 and hippocampus module M3 are associated with the protein  
335 polyubiquitination process (Figure S10). The top-ranked hub genes in muscle M12 were  
336 *DDX3X*, *KIF5B* and *USP7* (Figure S9A). Those genes are related to DNA damage,  
337 translation and transport regulation in the cell. In the hippocampus module M3 (Figure  
338 9B), the three hub genes (*PPP3CB*, *DNM1L* and *ITFG1*) are involved in hydrolase



339 activity, apoptosis and programmed necrosis and modulating T-cell function. Although  
340 the hub genes with the highest scores were strongly related to metabolism and to tissue-  
341 specific functions in each of these two modules, their network neighborhood is  
342 associated with the protein quality control network. More specifically, the *PSMB5* and  
343 *PSMD3* genes are related to the proteasome complex and are connected to hub genes.

344  
345 We combined this hub gene analysis with GWAS association gene scores, and  
346 observed that *PSMB5*, *UBE2L3*, and *PSMD3* (Figure 5C, Table S9) are important in  
347 many age-related diseases or phenotypes, such as Alzheimer's disease, HDL  
348 cholesterol, LDL cholesterol, triglycerides, and insulin resistance. Other genes related to  
349 translation and proteasome complex were also strongly associated to such diseases,  
350 such as *PSMB5* with multiple sclerosis (Pascal (Lamparter *et al.*, 2016) gene score: *p*-  
351 value = 0.0348) and HDL cholesterol (Pascal gene score: *p*-value = 0.0155). Finally, we  
352 observed that the prioritized genes associated with age-related diseases from conserved  
353 functional modules change in opposite directions with healthy aging and with caloric  
354 restriction (Figure 5D). This differential expression is consistent with a causal role in  
355 these age related diseases, given the attenuating effect of caloric restriction on aging.  
356

## 357 Validation of marker genes using independent mouse studies

358 We analyzed the association of the expression levels of candidate genes with lifespan in  
359 different tissues of mouse recombinant inbred lines used for population genetics  
360 analyses, such as the BXD (Andreux *et al.*, 2012) and LXS (Liao *et al.*, 2010) strains.  
361 We observed an inverse correlation between transcript levels of *PSMB5* (Figure 5E) in  
362 the spleen of the BXD strains (average age at the time of transcript analysis 78 days; *p* =  
363  $7.14 \times 10^{-5}$ ) and in the prefrontal cortex of LXS lines (average age of 72-days; *p* = 0.03),  
364 and lifespan longevity. This correlation was consistent even after correction for the  
365 population structures with mixed models (Kang *et al.*, 2008). Thus lower expression of  
366 *PSMB5* is linked to lifespan. Consistent with this, the GSEA showed down-regulation of  
367 the proteasome complex during the lifespan of the mice (Figure 5E, left panel).  
368

## 369 Discussion

370 The challenge of detecting underlying mechanisms of healthy aging that are  
371 evolutionarily conserved is thought to be a key impediment for understanding human  
372 aging biology (Fontana *et al.*, 2010). In this work, we coupled evolutionary and functional  
373 information of healthy aging gene expression studies to identify conserved age-related  
374 systems-level changes. We identified conserved functional modules by integration of co-  
375 expression networks, and we prioritized genes highlighted by GWAS of age-related  
376 diseases and traits. The observations on several functional levels allowed us to highlight  
377 the role of proteostasis, which includes all processes related to protein quality control  
378 network, as a strong core process associated with normal aging.

379  
380 Previous observations restricted to a small number of evolutionarily conserved genes  
381 with large effects in aging, or in age-related diseases, provided some evidence that  
382 aging mechanisms might be conserved among animals (de Magalhães, Curado and  
383 Church, 2009). However, transcriptome level correlations of expression changes in  
384 aging between species are very low in our gene-level results, in accordance with other

385 studies (Zahn *et al.*, 2006; Smith *et al.*, 2008; Alexey A Fushan *et al.*, 2015). Yet the  
386 process of aging appears overall conserved, with notably common effects of  
387 interventions, such as caloric restriction, showing similar effects across species ranging  
388 from nematodes, flies, to mammals (Gems and Partridge, 2013). The solution to this  
389 apparent paradox seems to be that pathways are evolutionarily conserved in aging  
390 (Smith *et al.*, 2008), even when single genes are not. Indeed, we have found strong  
391 similarities in age-related gene sets between human and other species.

392  
393 Beyond individual pathways, the modular nature of aging has been previously reported  
394 at several levels, such as by protein-protein interaction network analysis during human  
395 and fruit fly brain aging (Xue *et al.*, 2007), human longevity network construction and  
396 identifying modules (Budovsky *et al.*, 2006), mouse age-related gene co-expression  
397 modules identification (Southworth, Owen and Kim, 2009), or aging and age-related  
398 diseases cluster detection in human aging (Fernandes *et al.*, 2016). Integrating co-  
399 expression networks across species, we identified 10 and 13 evolutionarily conserved  
400 functional modules for skeletal muscle and hippocampus, respectively. These conserved  
401 modules are not only enriched in processes known to be involved in healthy aging, such  
402 as immune-related pathways, they significantly overlap with results from age-related  
403 GWASs. The latter is of particular relevance, since finding causality for aging in GWAS  
404 is difficult, given its highly multifactorial nature (McDaid *et al.*, 2017). Of note, these  
405 modules can be tissue-specific, for example related to energy and amino acids in muscle  
406 (Figure 5A). Thus, aging is an evolutionarily conserved modular process, and this  
407 modularity is tissue-specific.

408  
409 An advantage of our approach is that it allows us to detect with good confidence  
410 processes whose changes in aging are quite subtle. This is important because healthy  
411 aging is not a dramatic process, akin to embryonic development or cancer, but a gradual  
412 change in tissues and cell types which keep their defining characteristics. In other words,  
413 old muscle and young muscle are very similar at the molecular level, as shown, e.g., by  
414 the log-fold change scale in Fig. 3: a log<sub>2</sub> age-related regression coefficient (Formula 1)  
415 of -0.005 corresponds to a decrease of only 1.0035 fold. Yet we are able to detect  
416 processes associated to these changes with strong confidence, and these processes are  
417 mostly known in to be age-related. The largest changes, thus easiest to detect, include  
418 metabolism (Finkel, 2015), transcription (Roy *et al.*, 2002), translation (Steffen and Dillin,  
419 2016), and immune response. Changes in expression for proteostasis-related genes are  
420 weaker, yet integrating at a systems level between species provided us with a strong  
421 signal.

422  
423 More broadly, our results strengthen the case for further investigation into the molecular  
424 program that links proteostasis to healthy aging. This is in line with “loss of proteostasis”  
425 as one of the nine proposed hallmarks of aging (López-Otín *et al.*, 2013; Walther *et al.*,  
426 2015). Aging involves a deregulation of the protein quality control network, and this is  
427 conserved between distant species. Changes in protein synthesis and protein  
428 degradation processes have already been linked to several age-related diseases, most  
429 notably Alzheimer’s and Parkinson’s disease (Morimoto and Cuervo, 2014). They may  
430 be fundamental to the response to normal aging because the accumulation of somatic  
431 and germline mutations can alter fine modulation of the protein homeostasis network  
432 and produce pathological alterations (Woodruff and Thompson, 2003; Khodakarami *et al.*,  
433 2015). Thus proteostasis provides a link between somatic genome-level changes  
434 and the phenotypic impact of aging. Our results show that during healthy or normal  
435 aging, the alterations in proteostasis network are rather subtle and discrete, by contrast

436 to the strong down-regulation of metabolic processes. This suggests that perhaps there  
437 is a cascade of triggered pathways as aging proceeds (Tomaru *et al.*, 2012) . Moreover,  
438 we detect evolutionarily conserved links inside modules between mitochondrial  
439 deregulation (hub genes) and protein homeostasis (neighboring genes) in normal aging,  
440 consistent with recent advances in the field (D 'amico, Sorrentino and Auwerx, 2017;  
441 Labbadia *et al.*, 2017; Sorrentino, Menzies and Auwerx, 2018).

442  
443 The main evolutionarily conserved gene candidates from proteostasis, *PSMB5* and  
444 *PSMD3*, are related to the proteasome. These two genes were tightly connected to  
445 metabolic hub genes in skeletal muscle and to filament organization genes in the  
446 hippocampus. The proteasome complex is down-regulated during aging in our results,  
447 and in a transgenic mouse mutant proteasome dysfunction led to shorter lifespan  
448 (Schmidt and Finley, 2014). In the database of gene expression Bgee (Bastian *et al.*,  
449 2008), human *PSMB5* and *PSMD3* have top expression in gastrocnemius muscle, with  
450 weaker expression in old age. Moreover, both genes showed significant association in  
451 GWAS studies with metabolic and disease traits. The *PSMB5* gene was validated by  
452 comparing mice strains, and the *PSMD3* gene was related with coronary artery disease,  
453 HDL cholesterol and fasting proinsulin, all indicators of healthspan, and would also be  
454 worthwhile to explore further.

455  
456 The association with caloric restriction studies strengthens the functional contribution to  
457 aging of the processes we identified. We observed that the gene-set signals were both  
458 evolutionarily conserved in caloric restriction, and shared between healthy aging and  
459 caloric restriction experiments. Genes related to proteostasis showed opposite directions  
460 in expression changes between human healthy aging and caloric restriction. This  
461 indicates that these functions are maintained during caloric restriction in humans but lost  
462 during aging, and reinforces the case for a causal link between proteostasis and healthy  
463 aging. Our observations are consistent with previous research in *C. elegans*, reporting  
464 improvement of proteostasis during caloric restriction treatments and extension of the  
465 lifespan (Depuydt *et al.*, 2013; Chondrogianni *et al.*, 2015). Notably, *PSMB5* and *PSMD3*  
466 follow this trend in caloric restriction relative to healthy aging, further suggesting that  
467 they are prime candidates to study genes underlying functional modules in healthy  
468 aging.

469  
470 Integrating biological processes based on evolutionary conservation allows  
471 distinguishing relevant signals from noise, despite the weak patterns in aging  
472 transcriptomes. Moreover, the fact that a process is similarly involved in aging in very  
473 different species strengthens the case for causality. This provides a promising  
474 foundation to search for relevant biomarkers of healthy aging of specific tissues, e.g.  
475 further analysis of directions of change in homologous tissues, in different model  
476 organisms.

477  
478 In summary, the large-scale, comprehensive gene expression characterization in our  
479 study provides insights in underlying evolutionarily conserved mechanisms in normal  
480 aging. While metabolic and certain tissue-specific pathways play a crucial role in aging,  
481 processes affecting the protein quality control network also show very consistent signal.  
482 Using both evolutionary and functional information, we detected conserved functional  
483 modules that allowed us to identify core proteostasis-related genes. These genes were  
484 implicated as important hits in age-related GWAS studies (Gomes, 2013). Together, the  
485 integrative systems-level approach facilitated the identification of conserved modularity  
486 of aging, and of candidate genes for future normal aging biomarkers.

487

## 488 **Figures**

### 489 **Figure 1. Study design and differential gene expression analysis.**

490 (A) An overview of the integration process based on transcriptomes across the species.  
491 (I) Analysis starts at the single-gene level by performing differential expression analysis  
492 per species between young and old adults (all samples in case of GTEx human data),  
493 and determining the orthogroups across species. (II) The orthogroups (OG) are  
494 summarized to single genes that represent age-associated conserved genes. (III) The  
495 same genes are then used to build the co-expression networks per species and being  
496 integrated in the final cross-species network. (See Methods, Figure S1A and S1B)

497 (B) The species used in the study with their phylogenetic relations and the alignment of  
498 their ages categories.

499 (C) Barplots representing the numbers of significantly differentially expressed age-  
500 related genes (FDR < 0.1) in old healthy individuals in each dataset used. Blue (resp.  
501 red) bars represent genes significantly up- (resp. down-) regulated in old adults.  
502

### 503 **Figure 2. Functional enrichment analysis of integrated age-associated conserved 504 genes.**

505 (A) Clustering of the age-related samples between human (20-30y; 61-70y) and mouse.  
506 The heatmaps show good concordance between the young and old samples between  
507 species based on the 1-1 orthologous genes that are differentially expressed.

508 (B) Bubble plot showing the number of GO categories with conserved change of  
509 expression in aging between species. The analysis only includes categorized GO terms  
510 that are significant (FDR < 0.05) and unique to the homologous quadruplets enrichment.

511 (C) GO enrichment of genes involved in processes related to proteostasis based on  
512 cellular component (CC) and biological process (BP). Lengths of bars represent GO  
513 log<sub>2</sub>-transformed enrichment scores.  
514

### 515 **Figure 3. Gene expression changes in the main aspects of the proteostasis 516 network in healthy aging human skeletal muscle.**

517 Conserved genes from macroautophagy (A), translation (B) and proteasome complex  
518 (C) in GTEx skeletal muscle data. Grey, conserved genes that are not significant (FDR >  
519 0.05) in human GTEx skeletal muscle data. The x-axis of the volcano plots shows the  
520 log<sub>2</sub> of age-regression coefficient (log<sub>2</sub> slope, Formula 1) across the samples in GTEx  
521 data (see Methods; Formula 1), named log<sub>2</sub> fold-change.

522 (D) Schematic outline of the gene expression direction of the proteostasis-linked  
523 processes in aging human muscle.  
524

### 525 **Figure 4. Cross-species aging-associated skeletal muscle and hippocampus 526 functional modules and GO enrichments.**

527 Module networks of skeletal muscle (A) and hippocampus (B) with GO and GWAS  
528 enrichments for modules of size greater than 10. The tables on the right show top GO  
529 BP terms (FDR < 0.1) enriched in the skeletal (upper panel) and hippocampus (lower  
530 panel) modules. The GWAS-associated disease column in the same table contains  
531 associations to the module passing a threshold of FDR < 0.2.  
532

### 533 **Figure 5. Module architectures and prioritization of candidate genes**



534 (A-B) Architecture of modules related to protein polyubiquitination (M2; A) and positive  
535 regulation of telomerase RNA (M4; B) with hub genes (in red) and their neighboring  
536 genes (in black), in skeletal muscle (A) and hippocampus (B).  
537 (C) GWAS heatmap of the conserved proteostasis-related genes that were prioritized in  
538 modules. The heatmap shows the strength of association of each gene (hubs and  
539 neighbouring genes from the interested modules) with GWAS.  
540 (D) Volcano plot of the prioritized and conserved genes in human dietary restriction  
541 dataset.  
542 (E) Validation plots for *PSMB5* gene in independent mouse studies, taken at 72 and 78  
543 days of age. The x-axis represents the expression values of the gene in 35 strains of  
544 LXS (upper scatterplot) and BXD (lower scatterplot), and y-axis maximum (upper  
545 scatterplot) and median (lower scatterplot) lifespan of that strain. The left panel shows  
546 GSEA enrichment relation between proteasome complex and lifespan.

547

## 548 [Supplemental Data](#)

549 Supplement Figures are in Supplemental document.

550 **Table S1. Expression datasets used in aging and caloric restriction analysis.** This  
551 table contains 2 sheets, corresponding to aging and dietary restriction experiments.

552

553 **Table S2. Differential expression statistics in skeletal muscle (human, mouse),**  
554 **hippocampus (human, mouse), whole body (fly, worm) for age-related**  
555 **experiments and skeletal muscle (human, mouse) and whole body (fly, worm) for**  
556 **dietary restriction.** This table contains 6 sheets, each sheet corresponds for tissue and  
557 species. In each sheet, rows correspond to genes with no cutoffs applied. The columns  
558 provide differential expression statistics for all the samples (GTEx) and two-group  
559 comparisons (model organisms).

560

561 **Table S3. Overlap between the 1-to-1 conserved age-related orthologs between**  
562 **human and model organisms.**

563

564 **Table S4. List of orthologous genes from integrative analysis.** This table contains 3  
565 sheets, corresponding to muscle, hippocampus and dietary restriction experiments that  
566 were integrated based on orthologous groups. The columns represent name of  
567 orthogroups, combined p-values across species from Fisher's combined probability test,  
568 original p-values from differential expression analysis per species and annotations of  
569 genes. The rows contain genes that are representative per orthologous group for each  
570 species.

571

572 **Table S5. Summarized clusters based on GO semantic similarity method.** This  
573 table contains 3 sheets, corresponding to muscle, hippocampus and dietary restriction  
574 GO analysis. The file shows the GO enrichments and categorization to higher (more  
575 general) GO terms.

576

577 **Table S6. Proteostasis-linked processes enriched in 2 tissues and dietary**  
578 **restriction experiments.** This table contains 3 sheets, corresponding to muscle,  
579 hippocampus and dietary restriction GO analysis for proteostasis-linked processes.



580

581 **Table S7. Significant conserved genes from human GTEx in proteostasis quality**  
582 **network for skeletal muscle and hippocampus.** This table contains 6 sheets for each  
583 part of the protein quality network (macroautophagy, translation and proteasome  
584 complex) per tissue.

585

586 **Table S8. Summary of the statistics from network analysis.** This table contains 5  
587 sheets of the information about the sizes of the all modules and GO and GWAS  
588 enrichments in each tissue for proteostasis-linked modules.

589

590 **Table S9. Summary of mapping the GWAS traits for selected modules.** This table  
591 contains the gene-level p-values from the PASCAL tool for the heatmap of Figure 5C for  
592 selected 22 GWAS age-related studies.

593

## 594 METHODS

595 **Data selection.** To obtain a representative set of aging gene expression experiments, a  
596 set of raw RNA-seq and microarray datasets of four species (*H. sapiens*, *M. musculus*,  
597 *D. melanogaster*, *C. elegans*) were downloaded from the GEO database (Barrett *et al.*,  
598 2013) and SRA database (Leinonen *et al.*, 2011) (Table S1). For observing aging gene  
599 expression signatures in human and mouse, we selected hippocampus and skeletal  
600 muscle tissues. The aging gene expression experiments for fly and worm were available  
601 as whole-body experiments. All the healthy or control samples came from two extreme  
602 age groups (young and old adults) that are counted from sexual maturity. This  
603 corresponds to 20-30 years old humans, 3-4 months old mice, 4-5 days old flies and 3-6  
604 days old worms (see Figure 1B) in young adults. In old adult age group, this corresponds  
605 to 60-70 years old humans, 20-24 months old mice, 40-50 days old flies and 12-14 days  
606 old worms. The sample size per age group was 3-6 replicates. The GTEx V6p read  
607 counts were used as *H. sapiens* aging experiment (V6p dbGaP accession  
608 phs000424.v6.p1, release date: October, 2016). The information about the sample ages  
609 was obtained through dbGAP annotation files of the GTEx project (restricted access).  
610 Two RNA-seq datasets were matched for *M. musculus* and *C. elegans*; and the  
611 microarray platforms included were from Affymetrix: Mouse 430 A/2.0, GeneChip  
612 Drosophila Genome array and *C. elegans* Genome array.

613

614 **GTEx v6p analysis.** From the downloaded GTEx V6p data, we extracted the gene read  
615 counts values for protein-coding genes by using Ensembl (release 91). For each tissue,  
616 the lowly expressed genes were excluded from data analysis according to the GTEx  
617 pipeline (Mele *et al.*, 2015). Prior to the age-related differential expression analysis, we  
618 used the PEER algorithm (Stegle *et al.*, 2012) in a two-step approach to account for  
619 known covariates as well as for hidden factors present in GTEx V6p data per tissue.  
620 From covariate files (Brain\_Hippocampus\_Analysis.covariates.txt and  
621 Muscle\_Skeletal\_Analysis.covariates.txt), we used information about the three genotype  
622 principal components. From phenotype file  
623 (phs000424.v6.pht002742.v6.p1.c1.GTEx\_Subject\_Phenotypes.GRU.txt), we used  
624 information about age, gender, ischemic time and BMI information. From attribute file  
625 (phs000424.v6.pht002743.v6.p1.c1.GTEx\_Sample\_Attributes.GRU.txt), we extracted  
626 information about the sample associations with interested tissues, hippocampus and  
627 skeletal muscle. In the first step, the PEER algorithm discovers patterns of common

628 variation; it created 15 and 35 assumed global hidden factors for hippocampus and  
629 skeletal muscle, respectively. In addition to global hidden factors, we provided age, BMI,  
630 sex and ischemic time as known covariates in PEER model. In the second step those  
631 hidden factors (gene expression principal components) that showed significant  
632 Pearson's correlation coefficient with age (p-value < 0.05) were excluded. The number of  
633 hidden factors that did not significantly correlate in hippocampus was 7/15 and in  
634 skeletal muscle were 22/35 that were selected for further linear model analysis. The sum  
635 of remaining hidden factors and known covariates were included in a linear regression  
636 model to obtain the genes differentially expressed during aging in GTEx V6p data for each  
637 tissue (Formula 1).

$$639 Y_{ji} = \mu_0 + \alpha_j Age_i + \gamma_j Sex_i + \beta_j BMI_i + \theta_j Ischemic\ time_i + \sum_{k=1}^n \delta_j PC_{ki} + \epsilon_i [1]$$

640  
641 where,  $Y_{ji}$  is the expression of a gene  $j$  in a sample  $i$ , where  $Age$ ,  $Sex$ ,  $BMI$ ,  $Ischemic$   
642  $time$  of sample  $i$ , with their regression coefficients  $\alpha$ ,  $\gamma$ ,  $\beta$ ,  $\theta$ .  $PC_{ki}$  ( $1 < k < n$ ) is the value  
643 of the  $k$ -hidden factors for the  $i$ -th sample with regression coefficient  $\delta$ ;  $n$  is a total  
644 number of factors that was not correlated with age,  $\epsilon_i$  is the error term, and  $\mu_0$  is the  
645 regression intercept. If  $\alpha > 0$ , gene  $j$  was treated as up-regulated, otherwise gene  $j$  was  
646 treated as down-regulated. The linear model (Formula 1) was performed in *limma voom*,  
647 and the p-values were corrected for multiple testing by performing false discovery rate  
648 (FDR) correction using Benjamini-Hochberg method.

649  
650 **Aging datasets microarray analysis.** For microarray datasets (both aging and caloric  
651 restriction experiments) from skeletal muscle of *M. musculus* and whole-body of *D.*  
652 *melanogaster*, raw Affymetrix .CEL files were downloaded from the GEO database and  
653 preprocessed using RMA normalization algorithm (Irizarry *et al.*, 2003) (Table S1). In  
654 case of multiple probes mapping to the genes on the array, the average of the probes  
655 was taken in further analysis. The annotation was used from Ensembl release 91. In  
656 order to identify the features that exhibit the most variation in the dataset, principal  
657 component analysis (PCA) was performed on the expression matrices to detect outlier  
658 samples, gender and other batches.

659  
660 **Aging datasets RNA-seq analysis.** For RNA-seq datasets from two model organisms,  
661 *M. musculus* and *C. elegans*, the .sra files were downloaded from the SRA database  
662 (Leinonen *et al.*, 2011). Both datasets were sequenced on Illumina HiSeq 2000 with read  
663 length 50nt. The reads were mapped to species-specific reference genomes (*M.*  
664 *musculus*: GRCm38.p5, *C. elegans*: WBCel235) using kallisto v0.43.1 (for index  
665 building: kallisto index -i genome.idx genome.cdna.all.fa (k-mer = 31, default option); for  
666 mapping: kallisto quant -i genome.idx -o output.file -single -l 200 -s 20  
667 single.end.fastq.file) (Bray *et al.*, 2016). Both *M. musculus* and *C. elegans* had single-  
668 end RNA-seq libraries in the experiments (Table S1.). The transcript abundances were  
669 summarized at the gene-level (Soneson, Love and Robinson, 2015). For both species,  
670 we used GTF gene annotation files that were downloaded from Ensembl ftp site (release  
671 91) (Aken *et al.*, 2016). The transcript abundances were summarized at the gene-level to  
672 lengthscaledTPMs using tximport v1.6.0 (Soneson, Love and Robinson, 2015) and used  
673 as an input to *limma voom*. The gene-level read counts were further analyzed in R  
674 v3.4.3. The read counts were normalized by total number of all mappable reads (library  
675 size) for each gene. The *limma voom* results in a matrix of normalized gene expression  
676 values on log2 scale. The counts and normalized log2 *limma voom* expression values  
677 were used as a raw input for all the analysis. Outlier samples were checked by principal

678 component analysis. For each species, genes that showed expression below 1 count per  
679 million (cpm < 1) in the group of replicates were excluded from downstream analysis.

680

681 **Identification of age-related differentially expressed genes.** To be able to obtain  
682 differentially expressed genes from different experiments that were normalized, we had  
683 to account for the possible batches present. Since we are not aware of all the batches in  
684 the studies, we used Surrogate Variable Analysis (SVA) to correct for batches (Leek and  
685 Storey, 2007) in microarray data analysis. The SVA method borrows the information  
686 across gene expression levels to estimate the large-scale effects of all factors absent  
687 from the model directly from the data. After species-specific expression matrices were  
688 corrected, they served as input into linear model analysis implemented in *limma*  
689 (Affymetrix) or *limma voom* (RNA-seq) (Law *et al.*, 2014), for finding age-related  
690 differentially expressed genes between two extreme aging groups, young and old.  
691 Briefly, *limma* uses moderate t-statistics that includes moderated standard errors across  
692 genes, therefore effectively borrowing strength from other genes to obtain the inference  
693 about each gene. The statistical significance of putatively age-dependent genes was  
694 determined with a false discovery rate (FDR) of 10%.

695

696 **Caloric restriction datasets microarray analysis.** The GEO database was used to  
697 download caloric restriction datasets (Table S1). Only muscle tissue was available in *H.*  
698 *sapiens*, therefore we selected correspondingly muscle tissue in mouse, but whole body  
699 in fly and worm. The datasets were normalized using RMA normalization algorithm  
700 (Irizarry *et al.*, 2003) (Table S1). In case of multiple probes mapping to the genes on the  
701 array, the average of the probes was taken in further analysis. The annotation was used  
702 from Ensembl release 91. To call differentially expressed genes, we used *limma*  
703 between caloric restriction and control samples. The statistical significance of putatively  
704 age-dependent genes was determined with a false discovery rate (FDR) of 5%.

705

706 **Age group alignments between species.** For deriving one-to-one orthologs, human  
707 genes were mapped to the homologs in the respective species using biomaRt v2.34.2.  
708 After detection of significant age-associated differentially expressed genes, we  
709 overlapped one-to-one orthologous genes between the species in order to observe the  
710 consistency of age groups between species. We took the *limma voom* corrected  
711 expression matrix for GTEx V6p and the expression matrices of model organisms, and  
712 selected only genes that were differentially expressed with an FDR of 5%. We then  
713 accounted for the laboratory batch effect by applying Combat on expression matrices  
714 (Leek *et al.*, 2012).

715

716 **Gene-level analysis.** To examine the relationship between aging in human and model  
717 organisms on single-gene level, we mapped one-to-one orthologous genes from human  
718 to model organisms and between the organisms downloaded from Ensembl (Aken *et al.*,  
719 2016). We calculated Spearman correlations between sets of matched differentially  
720 expressed orthologous genes, between log<sub>2</sub> fold-changes (Supplementary Figure S2).  
721 No cutoff for fold change was used.

722

723 **Constructing homologous quadruplets and enrichment analysis.** We downloaded  
724 hierarchical orthologous groups (HOGs, in further text referring to orthologous groups  
725 (OG)) across four species from the OMA (orthologous matrix analysis) database  
726 (Altenhoff *et al.*, 2015) at the Bilateria level (*Amphimedon queenslandica* (*Cnidaria*) was  
727 used as a metazoan outgroup), which resulted in 3232 orthologous groups. Briefly,  
728 hierarchical orthologous groups are gene families that contain orthologs (genes related

729 by speciation) and in-paralogs (genes related by duplication) at the taxonomic level  
730 which orthologous groups were defined. The sizes of orthologous groups in this study  
731 range from 4 to 246 genes. We filtered age-related genes per orthologous group per  
732 species in order to obtain representative species-specific genes per group. The genes  
733 within orthologous group were selected according to the  $P$  values from differentially  
734 expression analysis (Rittschof *et al.*, 2014). We applied Bonferroni correction on each  
735 orthologous group to the differential expression  $P$  values in order to correct for the size  
736 of the orthologous group. We then combined the corrected differential gene expression  
737  $P$  values across species using Fisher's combined probability test generating a new  $P$   
738 value from  $\chi^2$  distribution with  $2k$  degrees of freedom (Formula 2).

739

$$740 \quad -2 \sum_{i=1}^k \ln(P_i) \sim \chi_{2k}^2 \quad [2],$$

741

742 where  $P_i$  is species-specific gene  $P$  value from differential expression analysis within a  
743 OG.

744

745 We adjusted combined Fisher  $P$  values for multiple testing, and filtered orthologous  
746 groups with FDR of 10% for further analysis. This resulted in 2010 and 2075 common  
747 OGs for skeletal muscle and hippocampus, respectively. In caloric restriction  
748 experiments, we detected 1962 common OGs.

749 We performed general GO enrichment analysis using Fisher's test (topGO R package)  
750 on significant orthologous group genes and based on human gene set annotation to find  
751 functional enrichment of OGs in GO 'biological process' terms. To summarize the  
752 significantly enriched top 100 GO terms into main ones, we used the Wang GO semantic  
753 similarity method (Wang *et al.*, 2007) that takes into account the hierarchy of gene  
754 ontology, and performed hierarchical clustering (11 clusters for skeletal muscle and 13  
755 clusters for hippocampus, 10 clusters for caloric restriction) on the semantic matrix for  
756 both aging and caloric restriction experiments (Table S5). The clusters were then named  
757 according to the common term of the cluster. We associated proteostasis-linked  
758 processes to GO terms associated with 'translation', 'protein folding', 'proteasome  
759 assembly', 'macroautophagy', 'proteasome complex', 'endoplasmic reticulum',  
760 'lysosome' and others.

761 To perform the randomizations, we selected random genes from the differential  
762 expression matrices with the same number as the number of orthologous groups  
763 selected for skeletal muscle and hippocampus. The p-values associated with the random  
764 genes per species were then combined with the Fisher's combined test. The GO  
765 enrichment analysis was performed as for the observed data with focus on the 'biological  
766 process' and based on the human annotation. The procedure was repeated 100 times  
767 (Figure S6).

768

769 **Prioritization of OG gene pairs in multi-species co-expression network.** We aimed  
770 to detect gene sets that are perturbed in aging in different species. We selected the  
771 genes from previously formed significant age-related OGs per species and constructed  
772 the species-specific co-expression networks by calculating Pearson correlation  
773 coefficient between age-related OGs genes. In the resulting species-specific co-  
774 expression network, nodes represent genes and edges connect genes that are above a  
775 set significant threshold from Pearson correlation calculation ( $P$  value < 0.05). Only  
776 positively correlated genes were taken into account, while the negatively correlated  
777 genes and genes correlating under the threshold were set to zero. Negatively correlated  
778 genes might be interesting to detect complex regulatory patterns, but are beyond the



779 scope of this study. The cross-species network was obtained as follows (Stuart *et al.*,  
780 2003). Each co-expression link was assigned a rank within the species according to the  
781 Pearson correlation value. We then divided the species-specific ranks by the total  
782 number of OGs per tissue to normalize the ranks across the species (Formula 3,  
783 example for human, but same for other species).

784  $r_n = \frac{r_{cxh}}{N_{eog}}$  [3], where  $r_n$  is normalized gene pair rank,  $r_{cxh}$  is the rank of co-  
785 expression link in human and  $N_{eog}$  is the number of common evolutionary orthologous  
786 groups selected for tissue.

787  
788 The final gene-pair list was then obtained by integrating human, mouse, fly and worm  
789 ranked lists using robust aggregation, originally made for comparing two lists (Kolde *et al.*,  
790 2012). Briefly, using beta probability distribution on order statistics, we asked how  
791 probable is the co-expression link by taking into account the ranks of all four species.  
792 This method assigns a  $P$  value to each co-expression link in an aggregated list,  
793 indicating how much better it is ranked compared to the null model (random ordering).  
794 This yielded networks with 2887 and 3353 significant gene-pairs (edges) ( $P$  value <  
795 0.001) for skeletal muscle and hippocampus, respectively.

796 To confirm that the integrated age-related multi-species networks are significant, we  
797 selected randomly collected genes from each species. The numbers of selected genes  
798 was the same as in the OGs. We then formed the quadruplets and performed the same  
799 integration analysis as before. We repeated the procedure 100 times, and obtained 100  
800 randomly integrated multi-species networks (Figure S7). In both cases, random and  
801 original analysis, the annotation was based on human.

802  
803 **Clustering the integrated cross-species network.** In order to identify aging-  
804 associated functional modules, we created networks containing 1142 nodes (2887  
805 edges) in skeletal muscle and 1098 nodes (3353 edges) in hippocampus, from our  
806 prioritized gene pair list based on orthology and all edges between them. The negative  
807 logarithm (base 10) of  $P$  values from aggregated list was assigned as edge weights in  
808 both integrated networks. We decomposed the skeletal muscle and hippocampus  
809 integrated networks into components and the further analysis was restricted to analysis  
810 of a giant component. The giant component contained 1050 genes (nodes) in skeletal  
811 muscle and 1067 genes (nodes) in hippocampus. As before, we used human annotation.  
812 The modules within the cross-species networks of each tissue were obtained by using a  
813 multilevel community algorithm that takes into account edge weights (Yang, Algesheimer  
814 and Tessone, 2016) from igraph (Csárdi & Nepusz 2006). Briefly, the multilevel  
815 algorithm (Blondel *et al.*, 2008) takes into account each node as its own and assigns it to  
816 the community with which it achieves the highest contribution to modularity. To obtain  
817 Figure 4, we summarized groups of module nodes to single meta-nodes according to  
818 their multilevel-algorithm calculated module membership, and showed the inter-modular  
819 connectivity using a circular layout. We selected the modules with size greater than 10,  
820 which returned 12 modules per tissue-specific cross-species network. We checked the  
821 functional enrichment of genes within selected modules in every network using Gene  
822 Ontology through topGO R package (See Figure 4).

823 Moreover, we downloaded the pre-calculated file of gene-level summary statistics from  
824 37 GWASs from the Pascal method (Lamparter *et al.*, 2016). We selected 22 out of 37  
825 GWAS studies (Marbach *et al.*, 2016) (Table S9) that are associated with metabolic and  
826 neurological age-related diseases. To perform enrichment of the module genes within  
827 GWAS age-related diseases categories, we selected top-ranking genes (GWAS gene



828 score < 0.1) within each disease and formed the categories for enrichment. We ran  
829 enrichment analysis on final network modules to find disease-related modules (adjusted  
830 p-value < 0.2). The human genome was used as a background gene set.  
831 Finally, we used Kleinberg's hub centrality score to determine the hub genes within  
832 interested modules and observed the hub-gene neighborhood. The final genes were  
833 then selected to show their *P* value association within GWAS studies (Figure 5C, Table  
834 S9).

835  
836 **LXS and BXD mouse data.** Male and female mice from those strains were fed with  
837 normal ad libitum diet, and median and maximum lifespan were calculated to represent  
838 longevity across strains. Microarray data as well as lifespan data were downloaded from  
839 GeneNetwork.org. Microarray data from prefrontal cortex of LXS mice was generated by  
840 Dr. Michael Miles using animals with the average age of 72 days (GN Accession:  
841 GN130). Microarray data from spleen of BXD mice was generated by Dr. Robert W.  
842 Williams using animals with the average age of 78 days (GN Accession: GN283).  
843 Microarray data from hippocampus of BXD mice was generated by Dr. Gerd  
844 Kempermann and Dr. Robert W. Williams using animals with the average age of 70 days  
845 (GN Accession: GN110). To correct for the population structure within the strains, a  
846 linear mixed model approach was applied. For enrichment analysis, genes were ranked  
847 based on their Pearson correlation coefficients with the lifespan data of the BXD strains,  
848 and Gene Set Enrichment Analysis (GSEA) was performed to find the enriched gene  
849 sets correlated with the lifespan (Subramanian et al., 2005).

850

## 851 Author Contributions

852 Conceptualization, A.K. and M.R.R.; Methodology, A.K.; Investigation, A.K.;  
853 Preprocessing datasets: A.K, Formal Analysis, A.K.; Validation analysis: H.L.; Writing –  
854 Original Draft, A.K.; Writing – Review & Editing, A.K., H.L., V.S., J.A., Z.K. and M.R.R.;

855 Funding Acquisition, M.R.R.; Supervision, M.R.R.

856 The authors declare that they have no conflict of interest.

857

## 858 Acknowledgments

859 We thank Natasha Glover for help with the OMA database. We thank AgingX  
860 collaborators, Matthias Morf and all members of the Robinson-Rechavi group for helpful  
861 comments. We thank Thomas Flatt for critical reading of the manuscript. We are grateful  
862 to the teams that made their data available through Gene expression omnibus (GEO)  
863 and the database of Genotypes and Phenotypes (dbGAP) repositories. The  
864 computations were performed at the Vital-IT (<http://www.vital-it.ch>) center for high-  
865 performance computing of the SIB Swiss Institute of Bioinformatics. This work was  
866 supported by the AgingX project from SystemsX.ch, the EPFL, the Velux Stiftung (J.A.),  
867 and the NIH (R01AG043930).

868

869

## 870 References

- 871 Aken, B. L., Ayling, S., Barrell, D., Clarke, L., Curwen, V., Fairley, S., Fernandez Banet,  
872 J., Billis, K., García Girón, C., Hourlier, T., Howe, K., Kähäri, A., Kokocinski, F., Martin,  
873 F. J., Murphy, D. N., Nag, R., Ruffier, M., Schuster, M., Tang, Y. A., Vogel, J.-H., White, S.,  
874 Zadissa, A., Flicek, P. and Searle, S. M. J. (2016) 'The Ensembl gene annotation  
875 system', *Database*. Oxford University Press, 2016, p. baw093. doi:  
876 10.1093/database/baw093.
- 877 Altenhoff, A. M., kunca, N., Glover, N., Train, C.-M., Sueki, A., Pili ota, I., Gori, K.,  
878 Tomiczek, B., Muller, S., Redestig, H., Gonnet, G. H. and Dessimoz, C. (2015) 'The OMA  
879 orthology database in 2015: function predictions, better plant support, synteny view  
880 and other improvements', *Nucleic Acids Research*. Oxford University Press, 43(D1),  
881 pp. D240–D249. doi: 10.1093/nar/gku1158.
- 882 Andreux, P. A., Williams, E. G., Koutnikova, H., Houtkooper, R. H., Champy, M.-F.,  
883 Hugues, H., Schoonjans, K., Williams, R. W. and Auwerx, J. (2012) 'Systems Genetics  
884 of Metabolism: The Use of the BXD Murine Reference Panel for Multiscalar  
885 Integration of Traits', *Cell*. Cell Press, 150(6), pp. 1287–1299. doi:  
886 10.1016/J.CELL.2012.08.012.
- 887 Barrett, T., Wilhite, S. E., Ledoux, P., Evangelista, C., Kim, I. F., Tomashevsky, M.,  
888 Marshall, K. A., Phillippy, K. H., Sherman, P. M., Holko, M., Yefanov, A., Lee, H., Zhang,  
889 N., Robertson, C. L., Serova, N., Davis, S. and Soboleva, A. (2013) 'NCBI GEO: Archive  
890 for functional genomics data sets - Update', *Nucleic Acids Research*, 41(D1), pp. 991–  
891 995. doi: 10.1093/nar/gks1193.
- 892 Bass, T. M., Grandison, R. C., Wong, R., Martinez, P., Partridge, L. and Piper, M. D. W.  
893 (2015) 'Europe PMC Funders Group Optimization of Dietary Restriction Protocols in  
894 *Drosophila*', 62(10), pp. 1071–1081.
- 895 Bastian, F., Parmentier, G., Roux, J., Moretti, S., Laudet, V. and Robinson-Rechavi, M.  
896 (2008) 'Bgee: Integrating and Comparing Heterogeneous Transcriptome Data  
897 Among Species', in *Data Integration in the Life Sciences*. Berlin, Heidelberg: Springer  
898 Berlin Heidelberg, pp. 124–131. doi: 10.1007/978-3-540-69828-9\_12.
- 899 Baumgart, M., Priebe, S., Groth, M., Hartmann, N., Menzel, U., Pandolfini, L., Koch, P.,  
900 Felder, M., Ristow, M., Englert, C., Guthke, R., Platzer, M. and Cellerino, A. (2016)  
901 'Longitudinal RNA-Seq Analysis of Vertebrate Aging Identifies Mitochondrial  
902 Complex I as a Small-Molecule-Sensitive Modifier of Lifespan', *Cell Systems*. Elsevier,  
903 2(2), pp. 122–132. doi: 10.1016/j.cels.2016.01.014.
- 904 Blondel, V. D., Guillaume, J.-L., Lambiotte, R. and Lefebvre, E. (2008) 'Fast unfolding  
905 of communities in large networks'. doi: 10.1088/1742-5468/2008/10/P10008.
- 906 Bray, N. L., Pimentel, H., Melsted, P. and Pachter, L. (2016) 'Near-optimal  
907 probabilistic RNA-seq quantification', *Nature Biotechnology*, 34(5), pp. 525–527. doi:  
908 10.1038/nbt.3519.
- 909 Budovsky, A., Abramovich, A., Cohen, R., Chalifa-Caspi, V. and Fraifeld, V. (2006)  
910 'Longevity network: Construction and implications'. doi:  
911 10.1016/j.mad.2006.11.018.
- 912 Chondrogianni, N., Georgila, K., Kourtis, N., Tavernarakis, N. and Gonos, E. S. (2015)  
913 '20S proteasome activation promotes life span extension and resistance to

- 914 proteotoxicity in *Caenorhabditis elegans*.', *FASEB journal : official publication of the*  
915 *Federation of American Societies for Experimental Biology*. Federation of American  
916 Societies for Experimental Biology, 29(2), pp. 611–22. doi: 10.1096/fj.14-252189.
- 917 Csárdi, G. and Nepusz, T. (no date) 'The igraph software package for complex  
918 network research'. Available at:  
919 <http://www.necsi.edu/events/iccs6/papers/c1602a3c126ba822d0bc4293371c.pdf>  
920 (Accessed: 2 April 2017).
- 921 D'amico, D., Sorrentino, V. and Auwerx, J. (2017) 'Cytosolic Proteostasis Networks  
922 of the Mitochondrial Stress Response'. doi: 10.1016/j.tibs.2017.05.002.
- 923 van Dam, S., Vösa, U., van der Graaf, A., Franke, L. and de Magalhães, J. P. (2017)  
924 'Gene co-expression analysis for functional classification and gene–disease  
925 predictions', *Briefings in Bioinformatics*, p. bbw139. doi: 10.1093/bib/bbw139.
- 926 Depuydt, G., Xie, F., Petyuk, V. A., Shanmugam, N., Smolders, A., Dhondt, I., Brewer, H.  
927 M., Camp, D. G., Smith, R. D. and Braeckman, B. P. (2013) 'Reduced insulin/insulin-  
928 like growth factor-1 signaling and dietary restriction inhibit translation but  
929 preserve muscle mass in *Caenorhabditis elegans*.', *Molecular & cellular proteomics : MCP*. American Society for Biochemistry and Molecular Biology, 12(12), pp. 3624–  
930 39. doi: 10.1074/mcp.M113.027383.
- 931 Driscoll, I., Hamilton, D. A., Petropoulos, H., Yeo, R. A., Brooks, W. M., Baumgartner, R.  
932 N. and Sutherland, R. J. (2003) 'The Aging Hippocampus: Cognitive, Biochemical and  
933 Structural Findings', *Cerebral Cortex*. Oxford University Press, 13(12), pp. 1344–  
934 1351. doi: 10.1093/cercor/bhg081.
- 935 Fernandes, M., Wan, C., Tacutu, R., Barardo, D., Rajput, A., Wang, J., Thoppil, H.,  
936 Thornton, D., Yang, C., Freitas, A. and de Magalhães, J. P. (2016) 'Systematic analysis  
937 of the gerontome reveals links between aging and age-related diseases', *Human*  
938 *Molecular Genetics*. Oxford University Press, 25(21), p. ddw307. doi:  
939 10.1093/hmg/ddw307.
- 940 Finkel, T. (2015) 'The metabolic regulation of aging', *Nature Medicine*, 21, pp. 1416–  
941 1423. Available at:  
942 <https://www.nature.com/nm/journal/v21/n12/pdf/nm.3998.pdf> (Accessed: 23  
943 May 2017).
- 944 Flurkey, K., M. Curren, J. and Harrison, D. E. (2007) 'Chapter 20 – Mouse Models in  
945 Aging Research', in *The Mouse in Biomedical Research*, pp. 637–672. doi:  
946 10.1016/B978-012369454-6/50074-1.
- 947 Fontana, L., Partridge, L., Longo, V. D. and Longo, V. D. (2010) 'Extending Healthy  
948 Life Span—From Yeast to Humans IHHL^H^HHHilH^^^HKJSBI^ Extending Healthy  
949 Life Span -From Yeast to Humans', *Source: Science, New Series*, 328(5976), pp. 321–  
950 326. doi: 10.1126/science.1172539.
- 951 Fushan, A. A., Turanov, A. A., Lee, S.-G., Kim, E. B., Lobanov, A. V., Yim, S. H.,  
952 Buffenstein, R., Lee, S.-R., Chang, K.-T., Rhee, H., Kim, J.-S., Yang, K.-S. and Gladyshev,  
953 V. N. (2015) 'Gene expression defines natural changes in mammalian lifespan.',  
954 *Aging cell*, 14(3), pp. 352–65. doi: 10.1111/accel.12283.
- 955 Fushan, A. A., Turanov, A. A., Lee, S. G., Kim, E. B., Lobanov, A. V., Yim, S. H.,  
956 Buffenstein, R., Lee, S. R., Chang, K. T., Rhee, H., Kim, J. S., Yang, K. S. and Gladyshev, V.  
957 N. (2015) 'Gene expression defines natural changes in mammalian lifespan', *Aging*  
958 *Cell*, 14(3), pp. 352–365. doi: 10.1111/accel.12283.

- 960 Gems, D. and Partridge, L. (2013) 'Genetics of Longevity in Model Organisms:  
961 Debates and Paradigm Shifts', *Annu. Rev. Physiol.*, 75, pp. 621–44. doi:  
962 10.1146/annurev-physiol-030212-183712.
- 963 Gene Ontology Consortium, T., Ashburner, M., Ball, C. A., Blake, J. A., Botstein, D.,  
964 Butler, H., Michael Cherry, J., Davis, A. P., Dolinski, K., Dwight, S. S., Eppig, J. T., Harris,  
965 M. A., Hill, D. P., Issel-Tarver, L., Kasarskis, A., Lewis, S., Matese, J. C., Richardson, J. E.,  
966 Ringwald, M., Rubin, G. M. and Sherlock, G. (2000) 'Gene Ontology: tool for the  
967 unification of biology', *Nature genetics*, 25(1), pp. 25–29. Available at:  
968 [https://www.nature.com/articles/ng0500\\_25.pdf](https://www.nature.com/articles/ng0500_25.pdf) (Accessed: 20 November 2017).
- 969 Gomes, A. V (2013) 'Genetics of proteasome diseases.', *Scientifica*. Hindawi, 2013, p.  
970 637629. doi: 10.1155/2013/637629.
- 971 Greene, V. W. (2001) 'Personal hygiene and life expectancy improvements since  
972 1850: Historic and epidemiologic associations', *American Journal of Infection  
973 Control*. Mosby, 29(4), pp. 203–206. doi: 10.1067/MIC.2001.115686.
- 974 Hasin, Y., Seldin, M. and Lusis, A. (2017) 'Multi-omics approaches to disease',  
975 *Genome Biology*, 18(1), p. 83. doi: 10.1186/s13059-017-1215-1.
- 976 Irizarry, R. A., Bolstad, B. M., Collin, F., Cope, L. M., Hobbs, B. and Speed, T. P. (2003)  
977 'Summaries of Affymetrix GeneChip probe level data', *Nucleic acids research*, 31(4),  
978 p. e15. doi: 10.1093/nar/gng015.
- 979 Jones, O. R., Scheuerlein, A., Salguero-Gómez, R., Camarda, C. G., Schaible, R., Casper,  
980 B. B., Dahlgren, J. P., Ehrlén, J., García, M. B., Menges, E. S., Quintana-Ascencio, P. F.,  
981 Caswell, H., Baudisch, A. and Vaupel, J. W. (2014) 'Diversity of ageing across the tree  
982 of life'. doi: 10.1038/nature12789.
- 983 Kang, H. M., Zaitlen, N. A., Wade, C. M., Kirby, A., Heckerman, D., Daly, M. J. and Eskin,  
984 E. (2008) 'Efficient Control of Population Structure in Model Organism Association  
985 Mapping', *Genetics*, 178(3), pp. 1709–1723. doi: 10.1534/genetics.107.080101.
- 986 Kaushik, S. and Cuervo, A. M. (2015) 'Proteostasis and aging', *Nature Medicine*.  
987 Nature Research, 21(12), pp. 1406–1415. doi: 10.1038/nm.4001.
- 988 Khodakarami, A., Saez, I., Mels, J. and Vilchez, D. (2015) 'Mediation of organismal  
989 aging and somatic proteostasis by the germline.', *Frontiers in molecular biosciences*.  
990 Frontiers Media SA, 2, p. 3. doi: 10.3389/fmolb.2015.00003.
- 991 Kolde, R., Laur, S., Adler, P. and Vilo, J. (2012) 'Robust rank aggregation for gene list  
992 integration and meta-analysis', *Bioinformatics*. Oxford University Press, 28(4), pp.  
993 573–580. doi: 10.1093/bioinformatics/btr709.
- 994 Labbadia, J., Briellmann, R. M., Neto, M. F., Lin, Y.-F., Haynes, C. M. and Morimoto, R. I.  
995 (2017) 'Mitochondrial Stress Restores the Heat Shock Response and Prevents  
996 Proteostasis Collapse during Aging', *Cell Reports*. Cell Press, 21(6), pp. 1481–1494.  
997 doi: 10.1016/J.CELREP.2017.10.038.
- 998 Labbadia, J. and Morimoto, R. I. (2015) 'The Biology of Proteostasis in Aging and  
999 Disease', *Annual Review of Biochemistry*. Annual Reviews , 84(1), pp. 435–464. doi:  
1000 10.1146/annurev-biochem-060614-033955.
- 1001 Lamparter, D., Marbach, D., Rueedi, R., Kutalik, Z., Bergmann, S. and Kutalik, Z.  
1002 (2016) 'Fast and Rigorous Computation of Gene and Pathway Scores from SNP-  
1003 Based Summary Statistics', *PLOS Computational Biology*. Edited by J. Listgarten.  
1004 Public Library of Science, 12(1), p. e1004714. doi: 10.1371/journal.pcbi.1004714.
- 1005 Lanna, A., Gomes, D. C. O., Muller-Durovic, B., McDonnell, T., Escors, D., Gilroy, D. W.,



- 1006 Lee, J. H., Karin, M. and Akbar, A. N. (2017) 'A sestrin-dependent Erk–Jnk–p38 MAPK  
1007 activation complex inhibits immunity during aging', *Nature Immunology*. Nature  
1008 Research, 18(3), pp. 354–363. doi: 10.1038/ni.3665.
- 1009 Law, C. W., Chen, Y., Shi, W. and Smyth, G. K. (2014) 'voom: precision weights unlock  
1010 linear model analysis tools for RNA-seq read counts', *Genome Biology*, 15, p. R29.  
1011 doi: 10.1186/gb-2014-15-2-r29.
- 1012 Lee, G. D., Wilson, M. A., Zhu, M., Wolkow, C. A., De Cabo, R., Ingram, D. K. and Zou, S.  
1013 (2006) 'Dietary deprivation extends lifespan in *Caenorhabditis elegans*', *Aging Cell*,  
1014 5(6), pp. 515–524. doi: 10.1111/j.1474-9726.2006.00241.x.
- 1015 Leek, J. T., Johnson, W. E., Parker, H. S., Jaffe, A. E. and Storey, J. D. (2012) 'The sva  
1016 package for removing batch effects and other unwanted variation in high-  
1017 throughput experiments', *Bioinformatics*. Oxford University Press, 28(6), pp. 882–  
1018 883. doi: 10.1093/bioinformatics/bts034.
- 1019 Leek, J. T. and Storey, J. D. (2007) 'Capturing heterogeneity in gene expression  
1020 studies by surrogate variable analysis', *PLoS Genetics*, 3(9), pp. 1724–1735. doi:  
1021 10.1371/journal.pgen.0030161.
- 1022 Leinonen, R., Sugawara, H., Shumway, M. and International Nucleotide Sequence  
1023 Database Collaboration (2011) 'The sequence read archive.', *Nucleic acids research*.  
1024 Oxford University Press, 39(Database issue), pp. D19-21. doi:  
1025 10.1093/nar/gkq1019.
- 1026 Liao, C. Y., Rikke, B. A., Johnson, T. E., Diaz, V. and Nelson, J. F. (2010) 'Genetic  
1027 variation in the murine lifespan response to dietary restriction: From life extension  
1028 to life shortening', *Aging Cell*, 9(1), pp. 92–95. doi: 10.1111/j.1474-  
1029 9726.2009.00533.x.
- 1030 López-Otín, C., Blasco, M. A., Partridge, L., Serrano, M. and Kroemer, G. (2013) 'XThe  
1031 hallmarks of aging', *Cell*, 153(6). doi: 10.1016/j.cell.2013.05.039.
- 1032 de Magalhães, J. P., Curado, J. and Church, G. M. (2009) 'Meta-analysis of age-related  
1033 gene expression profiles identifies common signatures of aging.', *Bioinformatics*  
1034 (*Oxford, England*), 25(7), pp. 875–81. doi: 10.1093/bioinformatics/btp073.
- 1035 Marbach, D., Lamarter, D., Quon, G., Kellis, M., Kutalik, Z. and Bergmann, S. (2016)  
1036 'Tissue-specific regulatory circuits reveal variable modular perturbations across  
1037 complex diseases.', *Nature methods*, 13(January), pp. 1–44. doi:  
1038 10.1038/nmeth.3799.
- 1039 Marzetti, E. and Leeuwenburgh, C. (2006) 'Skeletal muscle apoptosis, sarcopenia  
1040 and frailty at old age', *Experimental Gerontology*, 41(12), pp. 1234–1238. doi:  
1041 10.1016/j.exger.2006.08.011.
- 1042 Mattison, J. A., Colman, R. J., Beasley, T. M., Allison, D. B., Kemnitz, J. W., Roth, G. S.,  
1043 Ingram, D. K., Weindruch, R., de Cabo, R., Anderson, R. M., Gibbs, R. A., Zimin, A. V.,  
1044 Bowden, D. M., Williams, D. D., Uno, H., Hudson, J. C., Baum, S. T., Frye, D. M., Roecker,  
1045 E. B., Kemnitz, J. W., Pandya, J. D., Ramsey, J. J., Laatsch, J. L., Kemnitz, J. W., Ngwenya,  
1046 L. B., Heyworth, N. C., Shwe, Y., Moore, T. L., Rosene, D. L., Masoro, E. J., Yu, B. P.,  
1047 Bertrand, H. A., Weindruch, R., Walford, R. L., Fligiel, S., Guthrie, D., Masoro, E. J.,  
1048 Gems, D., Partridge, L., Guarente, L., Houthoofd, K., Vanfleteren, J. R., Kennedy, B. K.,  
1049 Steffen, K. K., Kaeberlein, M., Mair, W., Dillin, A., Bodkin, N. L., Alexander, T. M.,  
1050 Ortmeier, H. K., Johnson, E., Hansen, B. C., Colman, R. J., Colman, R. J., Mattison, J. A.,  
1051 Weindruch, R., Walford, R. L., Lane, M. A., Kemnitz, J. W., Clarke, M. R., O'Neil, J. A.,



- 1052 Kanthaswamy, S., Genome, S. R. M., Colman, R. J., Anderson, R. M., Hadfield, R. M.,  
1053 Mattison, J. A., Ottinger, M. A., Powell, D., Longo, D. L., Ingram, D. K., Kemnitz, J. W.,  
1054 Kirkland, J. L., Peterson, C., Hansen, B. C., Bodkin, N. L., Rodriguez, N. A., Uno, H.,  
1055 Laakso, M., Kuusisto, J., Dailey, G., Polewski, M. A., Grove, K. L., Fried, S. K., Greenberg,  
1056 A. S., Xiao, X. Q., Clegg, D. J., Fontana, L., Heilbronn, L. K., Lefevre, M., Racette, S. B.,  
1057 Redman, L. M., Weiss, E. P., Edwards, I. J., Gresl, T. A., Rezzi, S., Yamada, Y., Kennedy,  
1058 B. K., Lopez-Otin, C., Blasco, M. A., Partridge, L., Serrano, M., Kroemer, G. and Saville,  
1059 D. J. (2017) 'Caloric restriction improves health and survival of rhesus monkeys',  
1060 *Nature Communications*. Nature Publishing Group, 8(May 2016), p. 14063. doi:  
1061 10.1038/ncomms14063.
- 1062 McCarroll, S. A., Murphy, C. T., Zou, S., Pletcher, S. D., Chin, C.-S., Jan, Y. N., Kenyon, C.,  
1063 Bargmann, C. I. and Li, H. (2004) 'Comparing genomic expression patterns across  
1064 species identifies shared transcriptional profile in aging.', *Nature genetics*, 36(2), pp.  
1065 197–204. doi: 10.1038/ng1291.
- 1066 Mcdaid, A. F., Joshi, P. K., Porcu, E., Komljenovic, A., Li, H., Sorrentino, V., Litovchenko,  
1067 M., Bevers, R. P. J., Rüeger, S., Reymond, A., Bochud, M., Deplancke, B., Williams, R. W.,  
1068 Robinson-Rechavi, M., Paccaud, F., Rousson, V., Auwerx, J., Wilson, J. F. and Kutalik, Z.  
1069 (2017) 'ARTICLE Bayesian association scan reveals loci associated with human  
1070 lifespan and linked biomarkers', *Nature Communications*, 8. doi:  
1071 10.1038/ncomms15842.
- 1072 Mele, M., Ferreira, P. G., Reverter, F., DeLuca, D. S., Monlong, J., Sammeth, M., Young,  
1073 T. R., Goldmann, J. M., Pervouchine, D. D., Sullivan, T. J., Johnson, R., Segre, A. V.,  
1074 Djebali, S., Niarchou, A., Consortium, T. G., Wright, F. A., Lappalainen, T., Calvo, M.,  
1075 Getz, G., Dermitzakis, E. T., Ardlie, K. G. and Guigo, R. (2015) 'The human  
1076 transcriptome across tissues and individuals', *Science*, 348(6235), pp. 660–665. doi:  
1077 10.1126/science.aaa0355.
- 1078 Morimoto, R. I. and Cuervo, A. M. (2014) 'Proteostasis and the Aging Proteome in  
1079 Health and Disease', *The Journals of Gerontology Series A: Biological Sciences and  
1080 Medical Sciences*. Oxford University Press, 69(Suppl 1), pp. S33–S38. doi:  
1081 10.1093/gerona/glu049.
- 1082 Pyo, J.-O., Yoo, S.-M., Ahn, H.-H., Nah, J., Hong, S.-H., Kam, T.-I., Jung, S. and Jung, Y.-K.  
1083 (2013) 'Overexpression of Atg5 in mice activates autophagy and extends lifespan',  
1084 *Nature Communications*. Nature Publishing Group, 4, p. ncomms3300. doi:  
1085 10.1038/ncomms3300.
- 1086 Rappuoli, R., Mandl, C. W., Black, S. and De Gregorio, E. (2011) 'Vaccines for the  
1087 twenty-first century society', *Nature Reviews Immunology*. Nature Publishing Group,  
1088 11(12), p. nri3085. doi: 10.1038/nri3085.
- 1089 Rittschof, C. C., Bukhari, S. A., Sloofman, L. G., Troy, J. M., Caetano-Anollés, D., Cash-  
1090 Ahmed, A., Kent, M., Lu, X., Sanogo, Y. O., Weisner, P. A., Zhang, H., Bell, A. M., Ma, J.,  
1091 Sinha, S., Robinson, G. E., Stubbs, L., Kelly, D. and White, K. P. (2014)  
1092 'Neuromolecular responses to social challenge: Common mechanisms across mouse,  
1093 stickleback fish, and honey bee', *Proceedings of the national Academy of Sciences*,  
1094 111(50), pp. 17929–17934. doi: 10.1073/pnas.1420369111.
- 1095 Rodriguez, K. A., Edrey, Y. H., Osmulski, P., Gaczynska, M. and Buffenstein, R. (2012)  
1096 'Altered Composition of Liver Proteasome Assemblies Contributes to Enhanced  
1097 Proteasome Activity in the Exceptionally Long-Lived Naked Mole-Rat', *PLoS ONE*.

- 1098 Edited by J. L. Brodsky, 7(5), p. e35890. doi: 10.1371/journal.pone.0035890.
- 1099 Roy, A. K., Oh, T., Rivera, O., Mubiru, J., Song, C. S. and Chatterjee, B. (2002) 'Impacts
- 1100 of transcriptional regulation on aging and senescence.', *Ageing research reviews*,
- 1101 1(3), pp. 367–80. Available at: <http://www.ncbi.nlm.nih.gov/pubmed/12067592>
- 1102 (Accessed: 23 May 2017).
- 1103 Schmidt, M. and Finley, D. (2014) 'Regulation of proteasome activity in health and
- 1104 disease.', *Biochimica et biophysica acta*. NIH Public Access, 1843(1), pp. 13–25. doi:
- 1105 10.1016/j.bbamcr.2013.08.012.
- 1106 Selman, C. and Hempenstall, S. (2012) 'Evidence of a metabolic memory to early-life
- 1107 dietary restriction in male C57BL/6 mice.', *Longevity & healthspan*, 1, p. 2. doi:
- 1108 10.1186/2046-2395-1-2.
- 1109 Smith, E. D., Tsuchiya, M., Fox, L. A., Dang, N., Hu, D., Kerr, E. O., Johnston, E. D., Tchao,
- 1110 B. N., Pak, D. N., Welton, K. L., Promislow, D. E. L., Thomas, J. H., Kaerberlein, M. and
- 1111 Kennedy, B. K. (2008) 'Quantitative evidence for conserved longevity pathways
- 1112 between divergent eukaryotic species', *Genome Research*, 18(4), pp. 564–570. doi:
- 1113 10.1101/gr.074724.107.
- 1114 Sonesson, C., Love, M. I. and Robinson, M. D. (2015) 'Differential analyses for RNA-
- 1115 seq: transcript-level estimates improve gene-level inferences.', *F1000Research*, 4(0),
- 1116 p. 1521. doi: 10.12688/f1000research.7563.2.
- 1117 Sorrentino, V., Menzies, K. J. and Auwerx, J. (2018) 'Repairing Mitochondrial
- 1118 Dysfunction in Disease', *Annual Review of Pharmacology and Toxicology*. Annual
- 1119 Reviews , 58(1), pp. 353–389. doi: 10.1146/annurev-pharmtox-010716-104908.
- 1120 Sorrentino, V., Romani, M., Mouchiroud, L., Beck, J. S., Zhang, H., D'Amico, D., Moullan,
- 1121 N., Potenza, F., Schmid, A. W., Rietsch, S., Counts, S. E. and Auwerx, J. (2017)
- 1122 'Enhancing mitochondrial proteostasis reduces amyloid- $\beta$  proteotoxicity', *Nature*.
- 1123 Nature Publishing Group, 552(7684), p. 187. doi: 10.1038/nature25143.
- 1124 Southworth, L. K., Owen, A. B. and Kim, S. K. (2009) 'Aging mice show a decreasing
- 1125 correlation of gene expression within genetic modules', *PLoS Genetics*, 5(12). doi:
- 1126 10.1371/journal.pgen.1000776.
- 1127 Steffen, K. K. and Dillin, A. (2016) 'A Ribosomal Perspective on Proteostasis and
- 1128 Aging'. doi: 10.1016/j.cmet.2016.05.013.
- 1129 Stegle, O., Parts, L., Piipari, M., Winn, J. and Durbin, R. (2012) 'Using probabilistic
- 1130 estimation of expression residuals (PEER) to obtain increased power and
- 1131 interpretability of gene expression analyses.', *Nature protocols*. Europe PMC
- 1132 Funders, 7(3), pp. 500–7. doi: 10.1038/nprot.2011.457.
- 1133 Stuart, J. M., Segal, E., Koller, D. and Kim, S. K. (2003) 'RESEARCH ARTICLES A Gene-
- 1134 Coexpression Network', *October*, 302(October), pp. 249–255. doi:
- 1135 10.1126/science.1087447.
- 1136 Subramanian, A., Tamayo, P., Mootha, V. K., Mukherjee, S., Ebert, B. L., Gillette, M. a,
- 1137 Paulovich, A., Pomeroy, S. L., Golub, T. R., Lander, E. S. and Mesirov, J. P. (2005) 'Gene
- 1138 set enrichment analysis: a knowledge-based approach for interpreting genome-wide
- 1139 expression profiles.', *Proceedings of the National Academy of Sciences of the United*
- 1140 *States of America*, 102(43), pp. 15545–50. doi: 10.1073/pnas.0506580102.
- 1141 The Gene Ontology Consortium (2017) 'Expansion of the Gene Ontology
- 1142 knowledgebase and resources', *Nucleic Acids Research*, 45(D1), pp. D331–D338. doi:
- 1143 10.1093/nar/gkw1108.

- 1144 Tian, X., Seluanov, A. and Gorbunova, V. (2017) 'Molecular Mechanisms Determining  
1145 Lifespan in Short- and Long-Lived Species.', *Trends in endocrinology and metabolism:*  
1146 *TEM*. Elsevier, 28(10), pp. 722–734. doi: 10.1016/j.tem.2017.07.004.
- 1147 Tomaru, U., Takahashi, S., Ishizu, A., Miyatake, Y., Gohda, A., Suzuki, S., Ono, A., Ohara,  
1148 J., Baba, T., Murata, S., Tanaka, K. and Kasahara, M. (2012) 'Decreased Proteasomal  
1149 Activity Causes Age-Related Phenotypes and Promotes the Development of  
1150 Metabolic Abnormalities', *The American Journal of Pathology*, 180(3), pp. 963–972.  
1151 doi: 10.1016/j.ajpath.2011.11.012.
- 1152 Walther, D. M., Kasturi, P., Zheng, M., Pinkert, S., Vecchi, G., Ciryam, P., Morimoto, R.  
1153 I., Dobson, C. M., Vendruscolo, M., Mann, M. and Hartl, F. U. (2015) 'Widespread  
1154 Proteome Remodeling and Aggregation in Aging *C. elegans*', *Cell*. Elsevier, 161(4),  
1155 pp. 919–932. doi: 10.1016/j.cell.2015.03.032.
- 1156 Wang, J. Z., Du, Z., Payattakool, R., Yu, P. S. and Chen, C.-F. (2007) 'A new method to  
1157 measure the semantic similarity of GO terms', *Bioinformatics*, 23(10), pp. 1274–  
1158 1281. doi: 10.1093/bioinformatics/btm087.
- 1159 Woodruff, R. C. and Thompson, J. N. (2003) 'The Role of Somatic and Germline  
1160 Mutations in Aging and a Mutation Interaction Model of Aging', *Journal of Anti-Aging*  
1161 *Medicine*, 6(1), pp. 29–39. doi: 10.1089/109454503765361560.
- 1162 Xue, H., Xian, B., Dong, D., Xia, K., Zhu, S., Zhang, Z., Hou, L., Zhang, Q., Zhang, Y. and  
1163 Han, J.-D. J. (2007) 'A modular network model of aging.', *Molecular systems biology*,  
1164 3(147), p. 147. doi: 10.1038/msb4100189.
- 1165 Yang, J., Huang, T., Petralia, F., Long, Q., Zhang, B., Argmann, C., Zhao, Y., Mobbs, C. V.,  
1166 Schadt, E. E., Zhu, J. and Tu, Z. (2015) 'Synchronized age-related gene expression  
1167 changes across multiple tissues in human and the link to complex diseases.',  
1168 *Scientific reports*, 5(October), p. 15145. doi: 10.1038/srep15145.
- 1169 Yang, Z., Algesheimer, R. and Tessone, C. J. (2016) 'A Comparative Analysis of  
1170 Community Detection Algorithms on Artificial Networks', *Scientific Reports*. Nature  
1171 Publishing Group, 6(July), p. 30750. doi: 10.1038/srep30750.
- 1172 Zahn, J. M., Sonu, R., Vogel, H., Crane, E., Mazan-Mamczarz, K., Rabkin, R., Davis, R. W.,  
1173 Becker, K. G., Owen, A. B. and Kim, S. K. (2006) 'Transcriptional Profiling of Aging in  
1174 Human Muscle Reveals a Common Aging Signature', *PLoS Genetics*. McGraw-Hill,  
1175 2(7), p. e115. doi: 10.1371/journal.pgen.0020115.
- 1176

# Cross-species Analysis Framework and Methodology

A

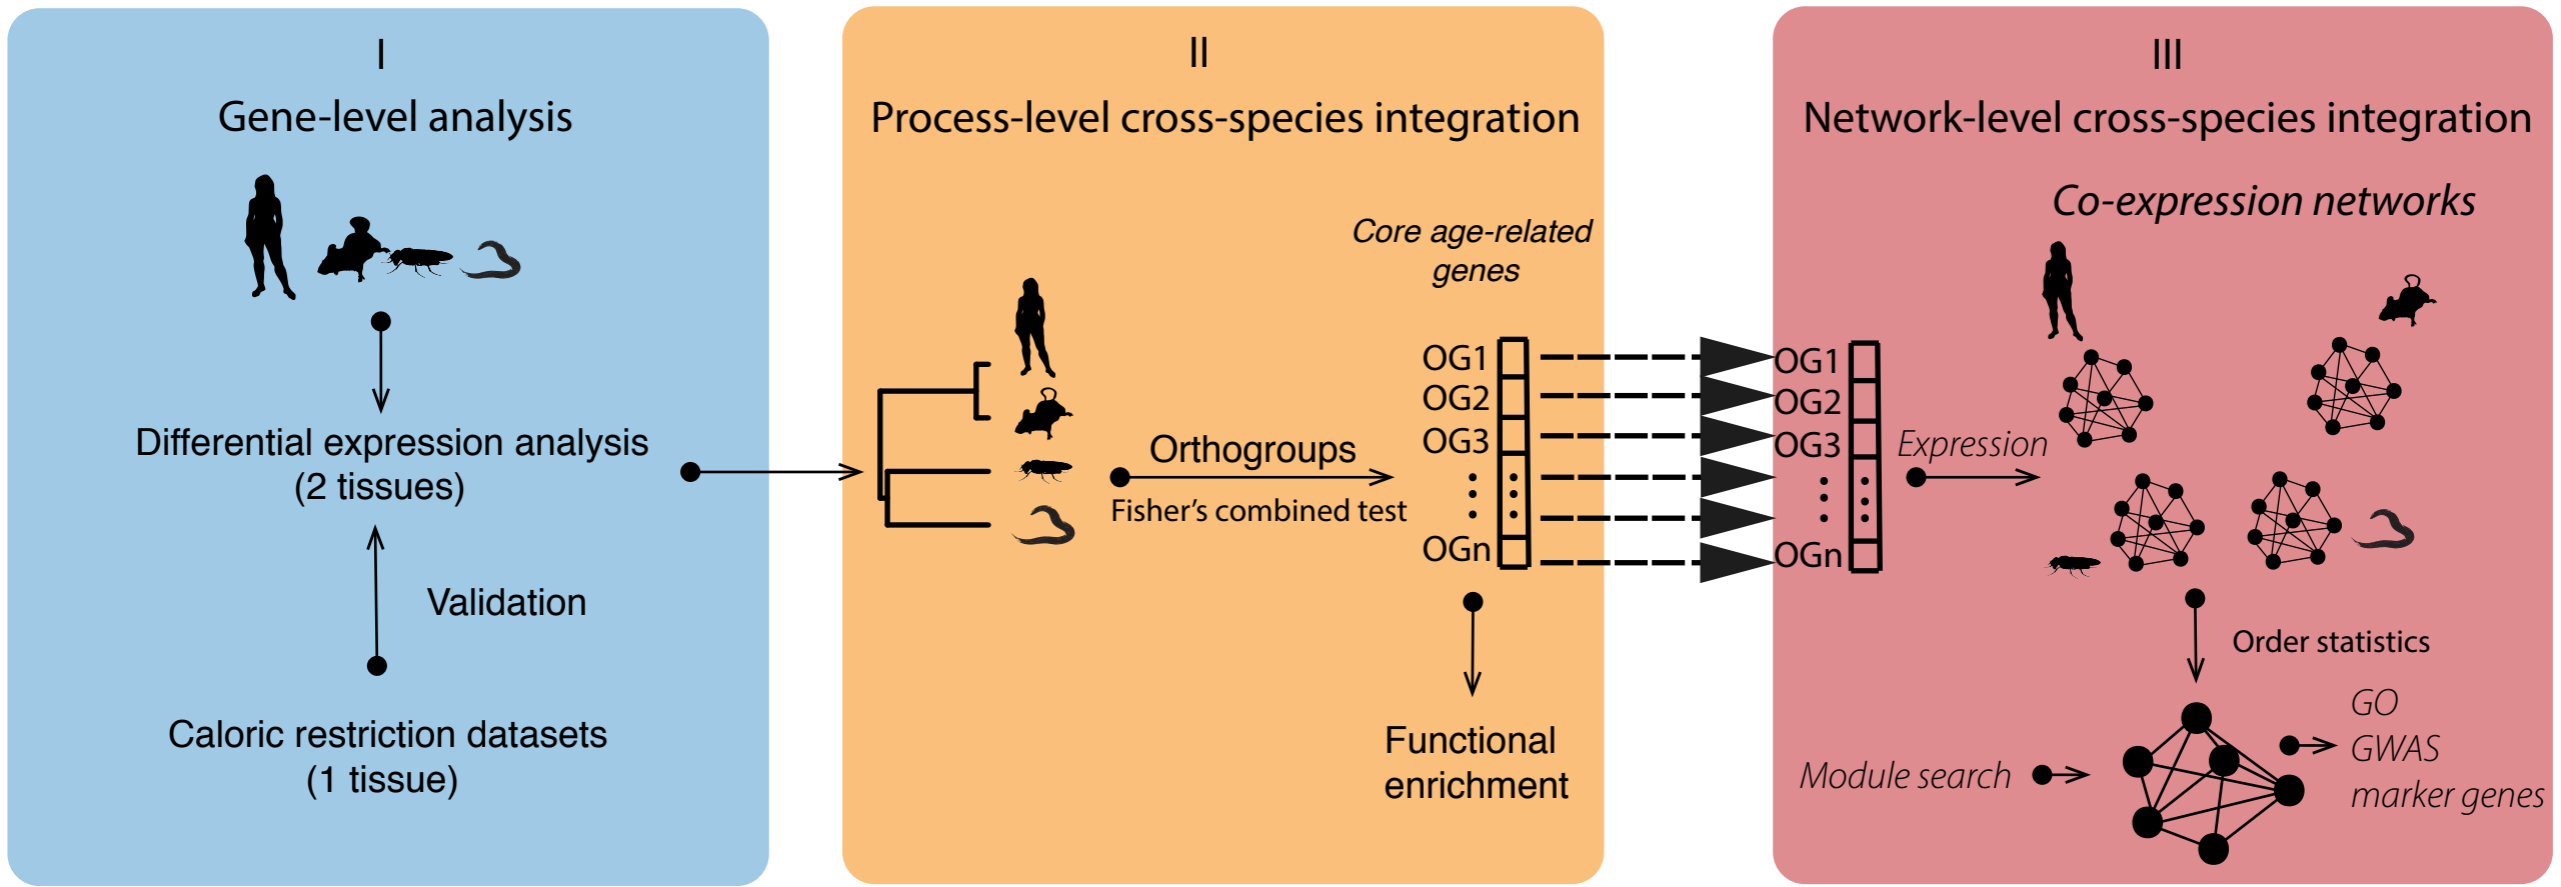

B

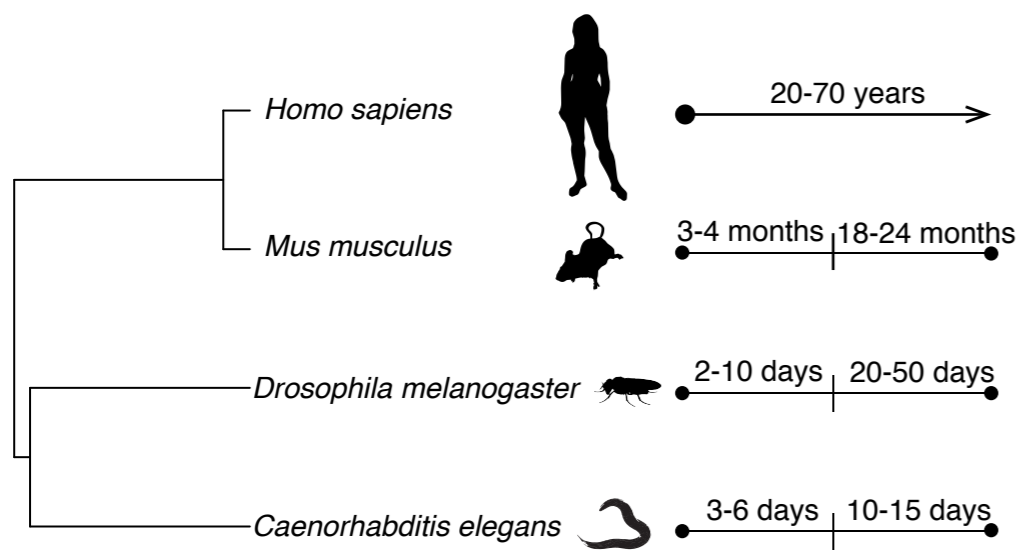

C

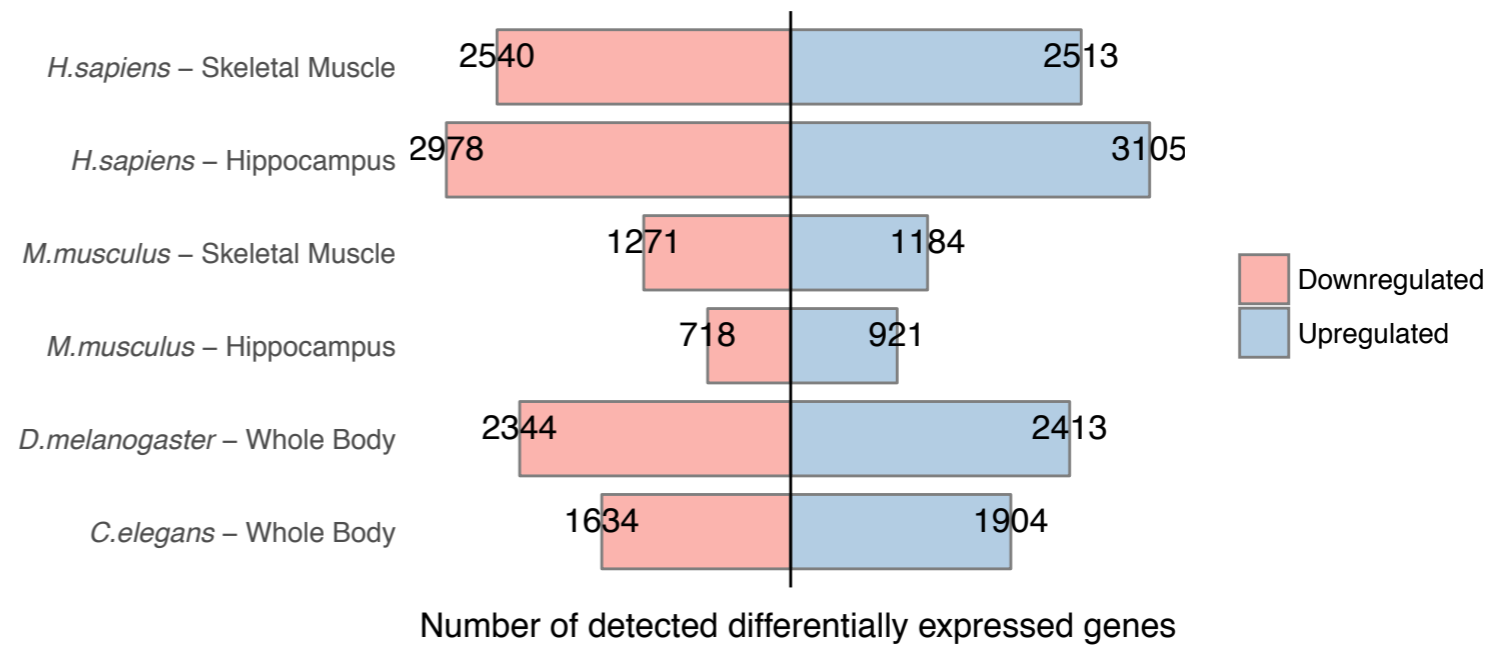



A

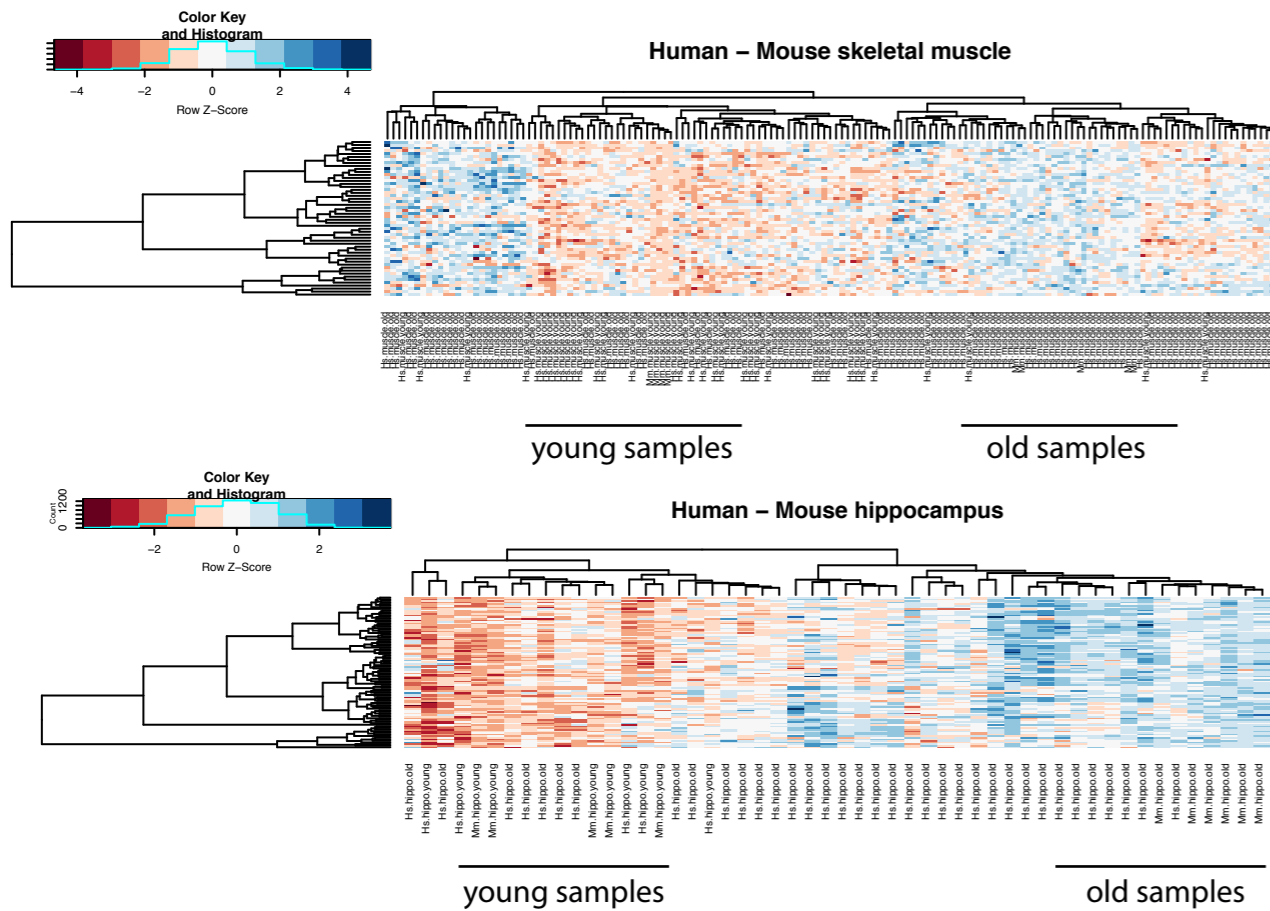

B

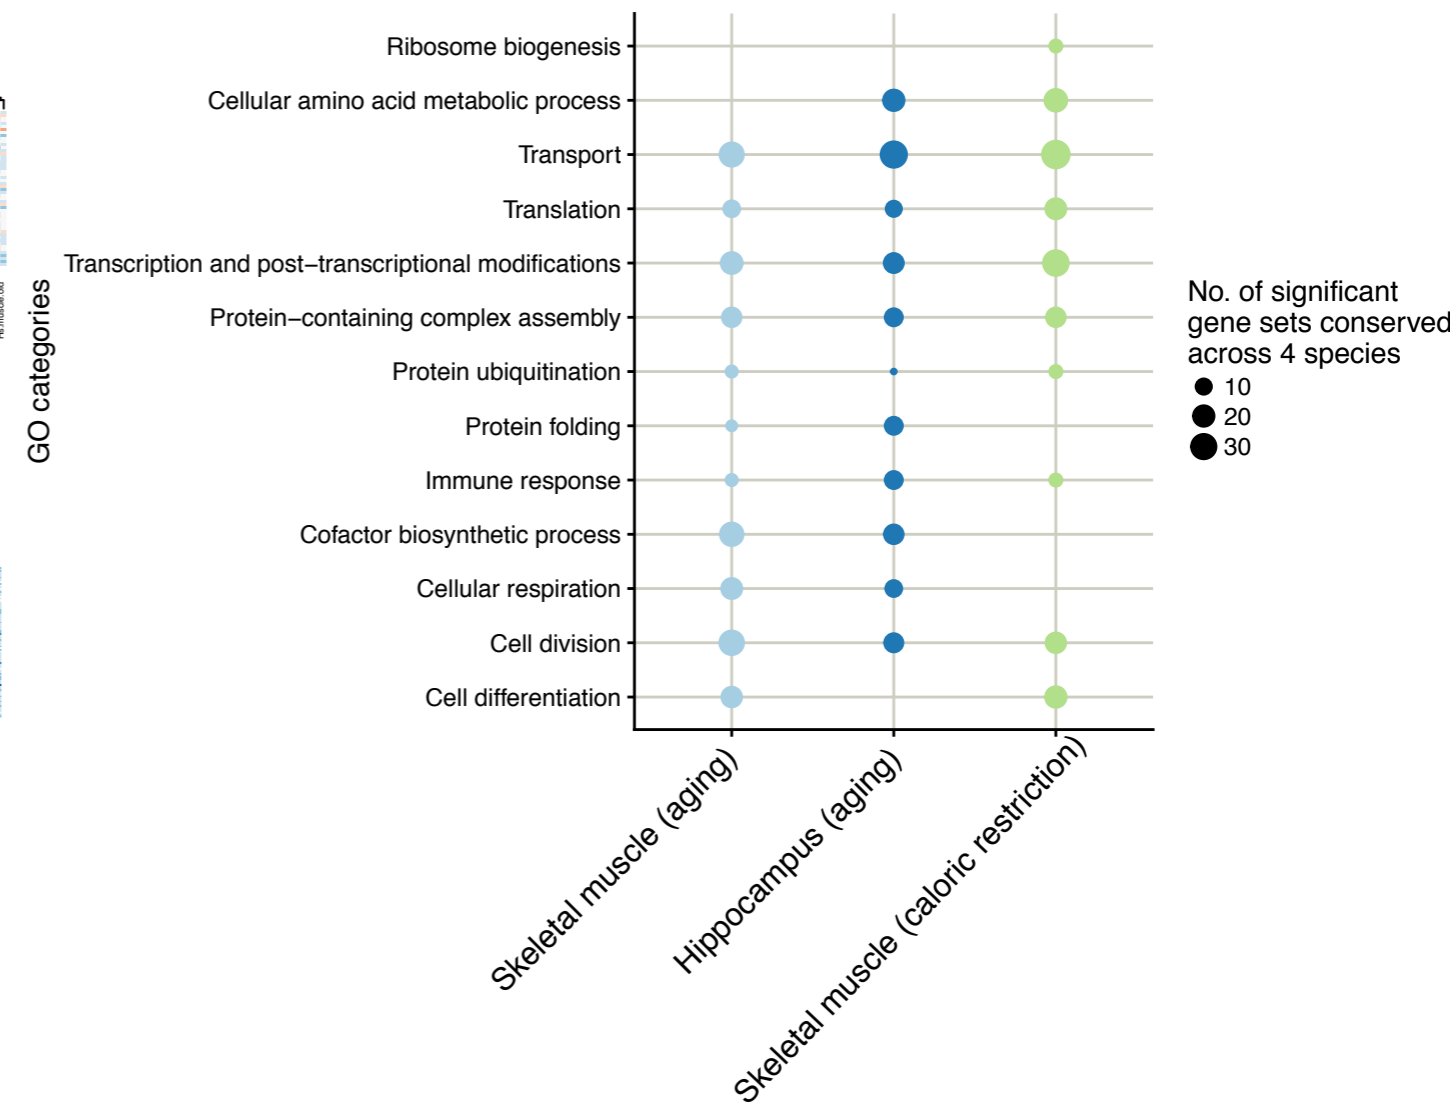

C

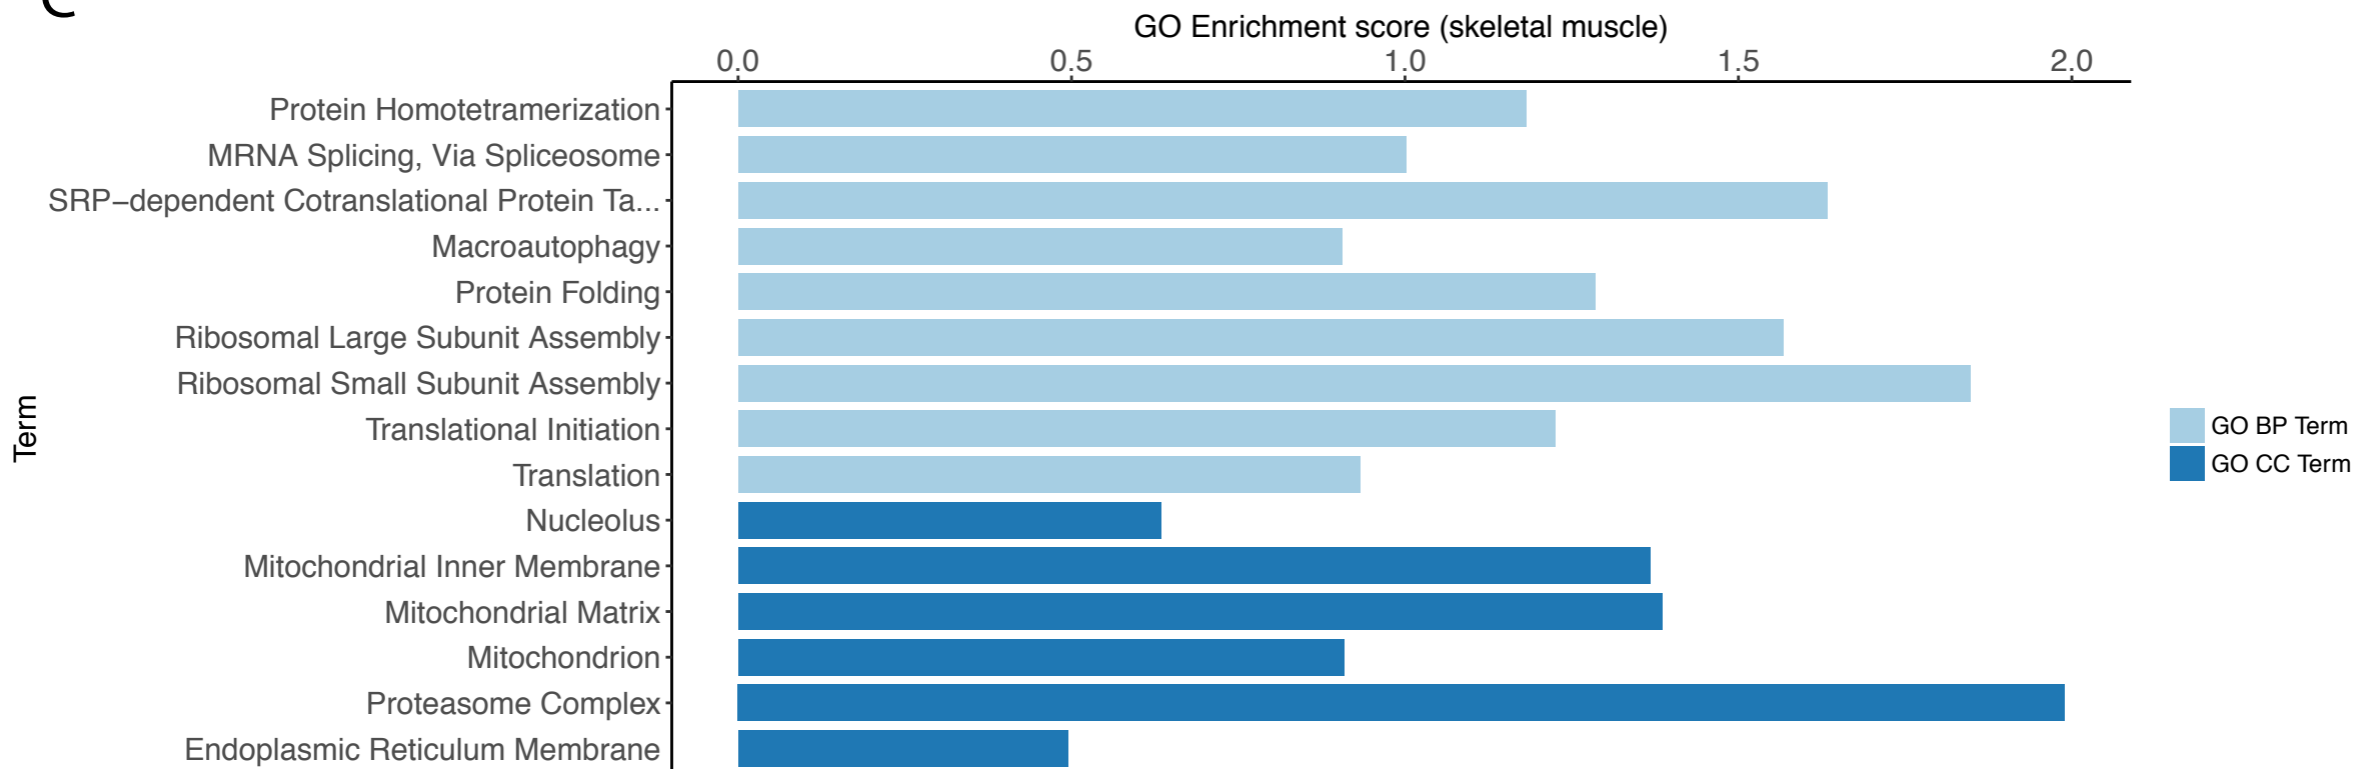

A

GO:0016236 macroautophagy  
(GTEx Skeletal Muscle)

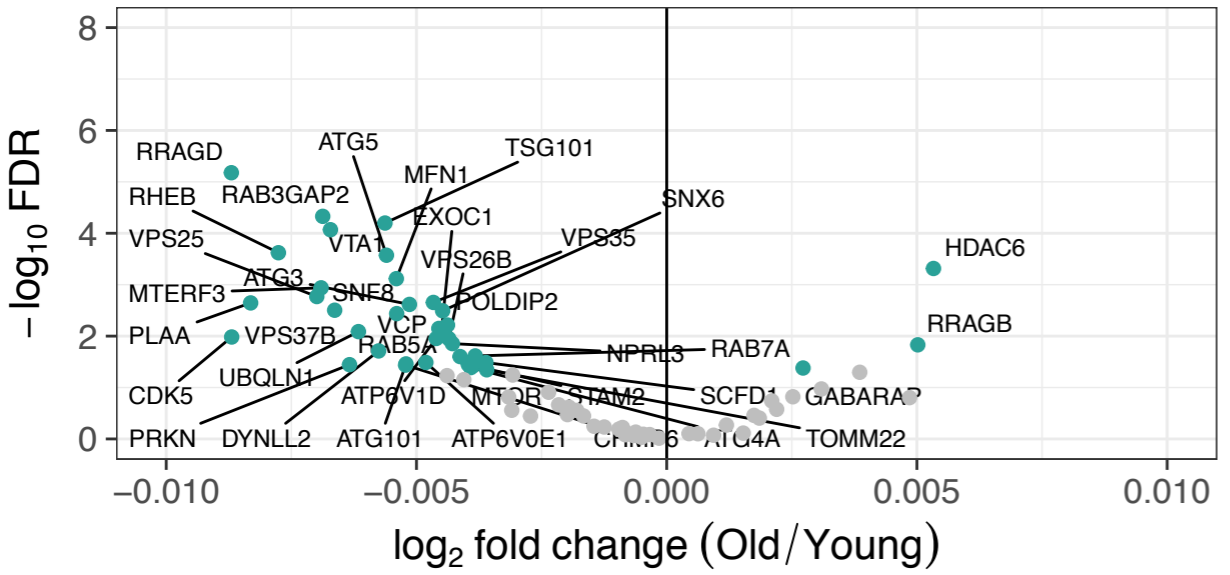

Significant ● FDR < 0.05 ● FDR > 0.05

B

GO:0006412 translation  
(GTEx Skeletal Muscle)

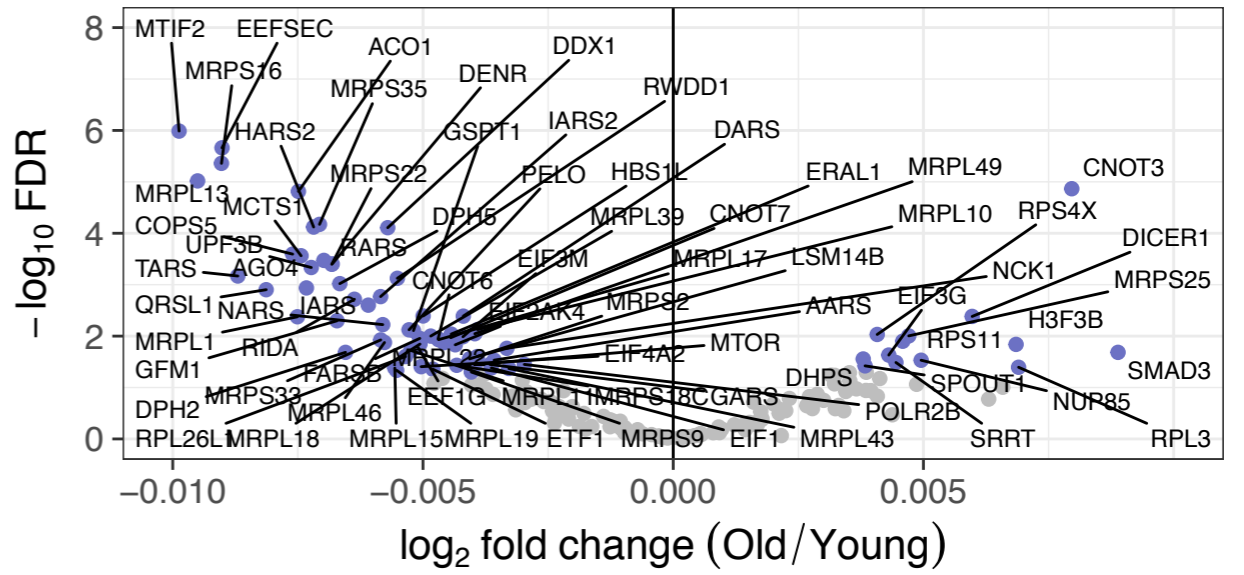

Significant ● FDR < 0.05 ● FDR > 0.05

C

GO:0000502 proteasome complex  
(GTEx Skeletal Muscle)

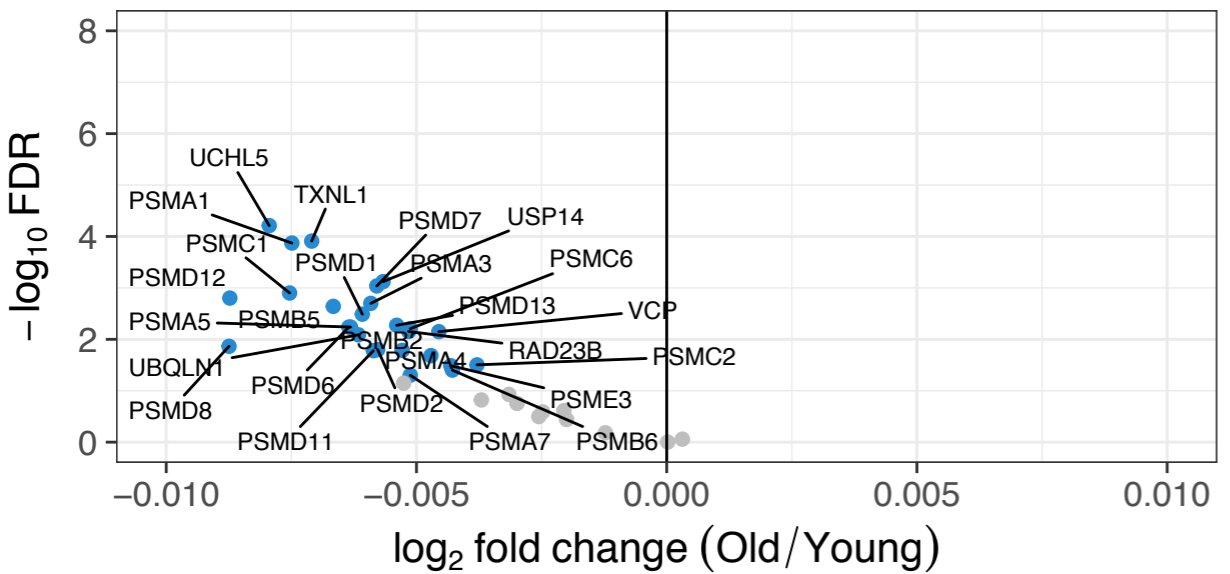

Significant ● FDR < 0.05 ● FDR > 0.05

D

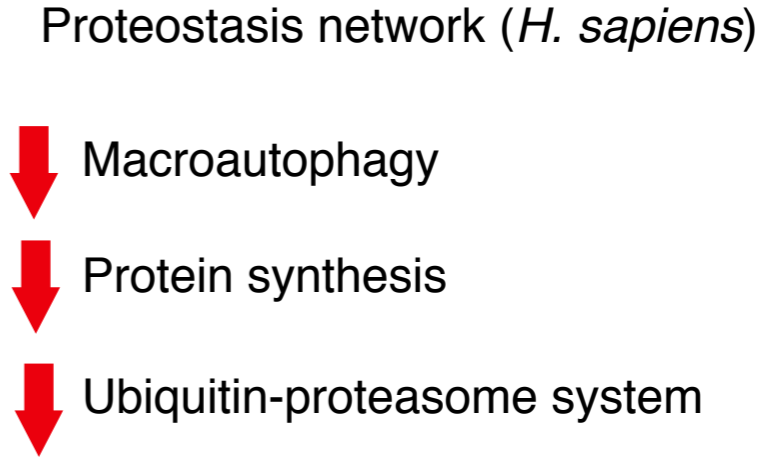

## Skeletal Muscle

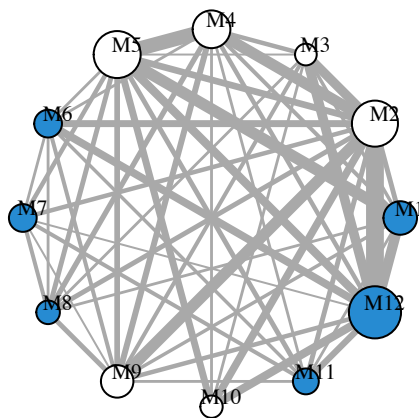

 Proteostasis-associated processes

| Module     | GO BP terms                                                                                                                                                                                                                     | GWAS-associated disease                        |
|------------|---------------------------------------------------------------------------------------------------------------------------------------------------------------------------------------------------------------------------------|------------------------------------------------|
| <b>M1</b>  | GO:0010972 negative regulation of G2/M transition of mitotic cell cycle<br>GO:0031146 SCF-dependent proteasomal ubiquitin-dependent protein catabolic process<br>GO:0006521 regulation of cellular amino acid metabolic process |                                                |
| <b>M2</b>  | GO:0043488 regulation of mRNA stability<br>GO:0006458 'de novo' protein folding<br>GO:0032212 positive regulation of telomere maintenance via telomerase                                                                        |                                                |
| <b>M3</b>  | GO:0000398 mRNA splicing, via spliceosome<br>GO:00321124 mRNA 3'-end processing                                                                                                                                                 | LDL cholesterol, Total cholesterol             |
| <b>M4</b>  | GO:0006094 gluconeogenesis<br>GO:0061621 canonical glycolysis                                                                                                                                                                   | 2hr glucose, multiple sclerosis, triglycerides |
| <b>M5</b>  | GO:0006099 tricarboxylic acid cycle<br>GO:0032981 mitochondrial respiratory chain complex I assembly                                                                                                                            | Insulin resistance                             |
| <b>M6</b>  | GO:0016241 regulation of macroautophagy<br>GO:0042147 retrograde transport, endosome to Golgi                                                                                                                                   |                                                |
| <b>M7</b>  | GO:0006413 translational initiation<br>GO:0006364 rRNA processing                                                                                                                                                               |                                                |
| <b>M8</b>  | GO:0006457 protein folding<br>GO:0006283 transcription-coupled nucleotide-excision repair                                                                                                                                       |                                                |
| <b>M9</b>  | GO:0006189 'de novo' IMP biosynthetic process<br>GO:0009113 purine nucleobase biosynthetic process                                                                                                                              |                                                |
| <b>M10</b> | GO:0097194 execution phase of apoptosis<br>GO:0048312 intracellular distribution of mitochondria                                                                                                                                |                                                |
| <b>M11</b> | GO:0042274 ribosomal small subunit biogenesis<br>GO:0006605 protein targeting                                                                                                                                                   |                                                |
| <b>M12</b> | GO:000209 protein polyubiquitination                                                                                                                                                                                            | Coronary artery disease                        |

## Hippocampus

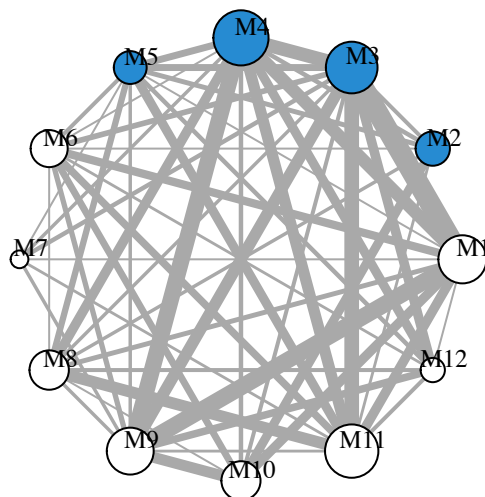

| Module     | GO BP terms                                                                                                                                 | GWAS-associated disease |
|------------|---------------------------------------------------------------------------------------------------------------------------------------------|-------------------------|
| <b>M1</b>  | GO:0006099 tricarboxylic acid cycle<br>GO:0006734 NADH metabolic process                                                                    |                         |
| <b>M2</b>  | GO:0006413 translational initiation<br>GO:0006364 rRNA processing<br>GO:0006614 SRP-dependent cotranslational protein targeting to membrane |                         |
| <b>M3</b>  | GO:0006886 intracellular protein transport<br>GO:0000209 protein polyubiquitination                                                         |                         |
| <b>M4</b>  | GO:1904874 positive regulation of telomerase RNA localization to Cajal body                                                                 | Coronary artery disease |
| <b>M5</b>  | GO:0014850 response to muscle activity<br>GO:0018344 protein geranylgeranylation                                                            |                         |
| <b>M6</b>  | GO:0055114 oxidation-reduction process                                                                                                      | Fasting proinsulin      |
| <b>M7</b>  | GO:0010976 positive regulation of neuron projection development                                                                             |                         |
| <b>M8</b>  | GO:1902001 fatty acid transmembrane transport                                                                                               |                         |
| <b>M9</b>  | GO:0050806 positive regulation of synaptic transmission                                                                                     |                         |
| <b>M10</b> | GO:0006120 mitochondrial electron transport, NADH to ubiquinone<br>GO:0032981 mitochondrial respiratory chain complex I assembly            |                         |
| <b>M11</b> | GO:0022618 ribonucleoprotein complex assembly<br>GO:0000082 G1/S transition of mitotic cell cycle                                           |                         |
| <b>M12</b> | GO:0006189 'de novo' IMP biosynthetic process<br>GO:0009113 purine nucleobase biosynthetic process                                          |                         |

### A Skeletal muscle M1 (GO:0031146 SCF-dependent proteasomal ubiquitin-dependent protein catabolic process)

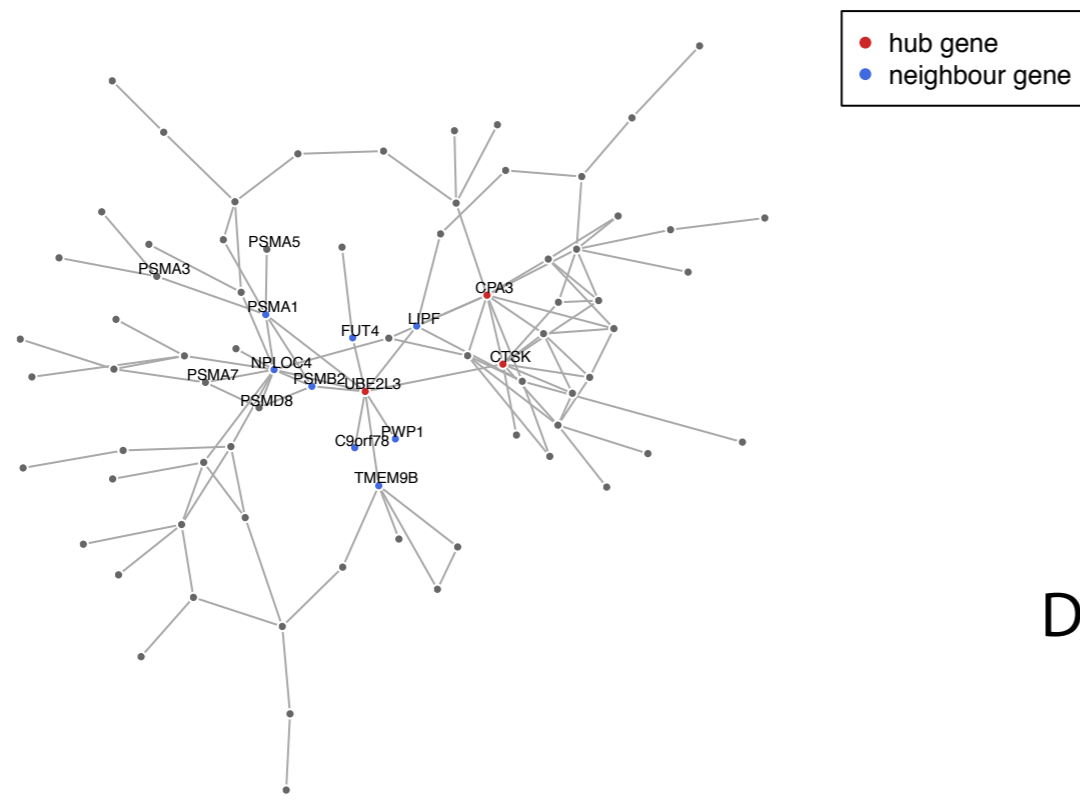

### B Hippocampus M4 (GO:1904874 positive regulation of telomerase RNA localization to Calaj body)

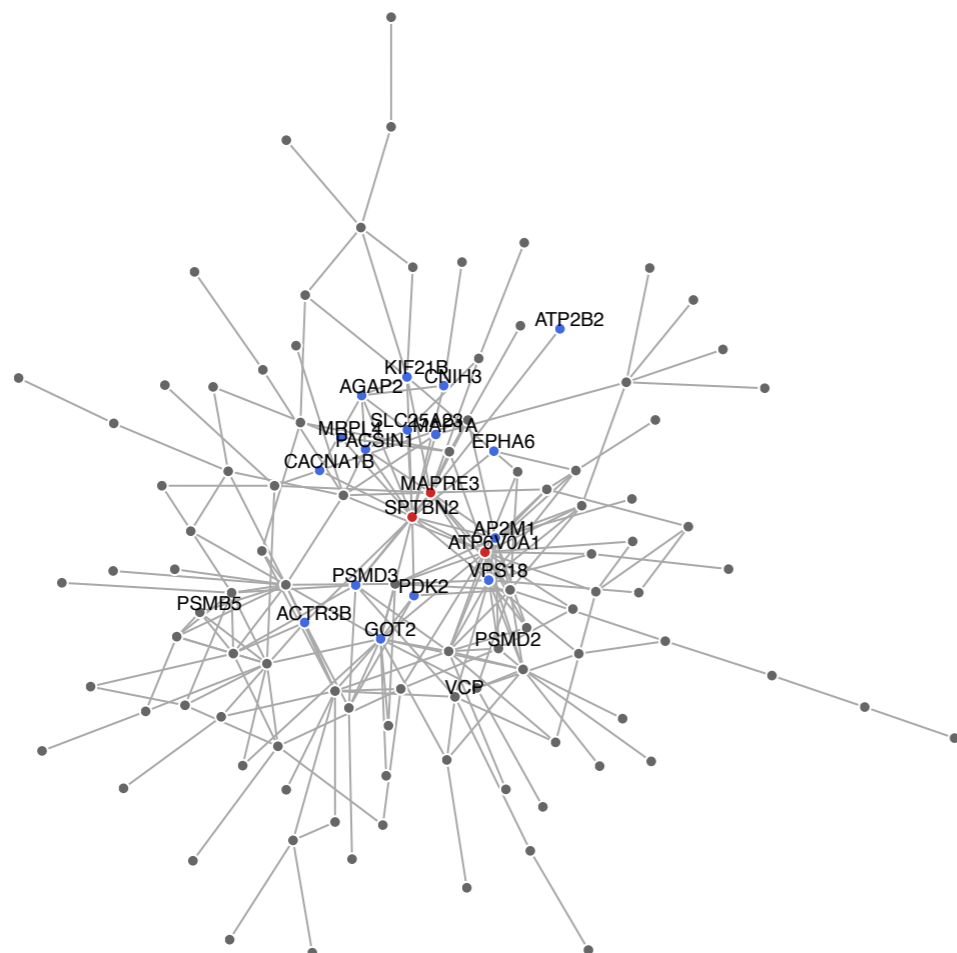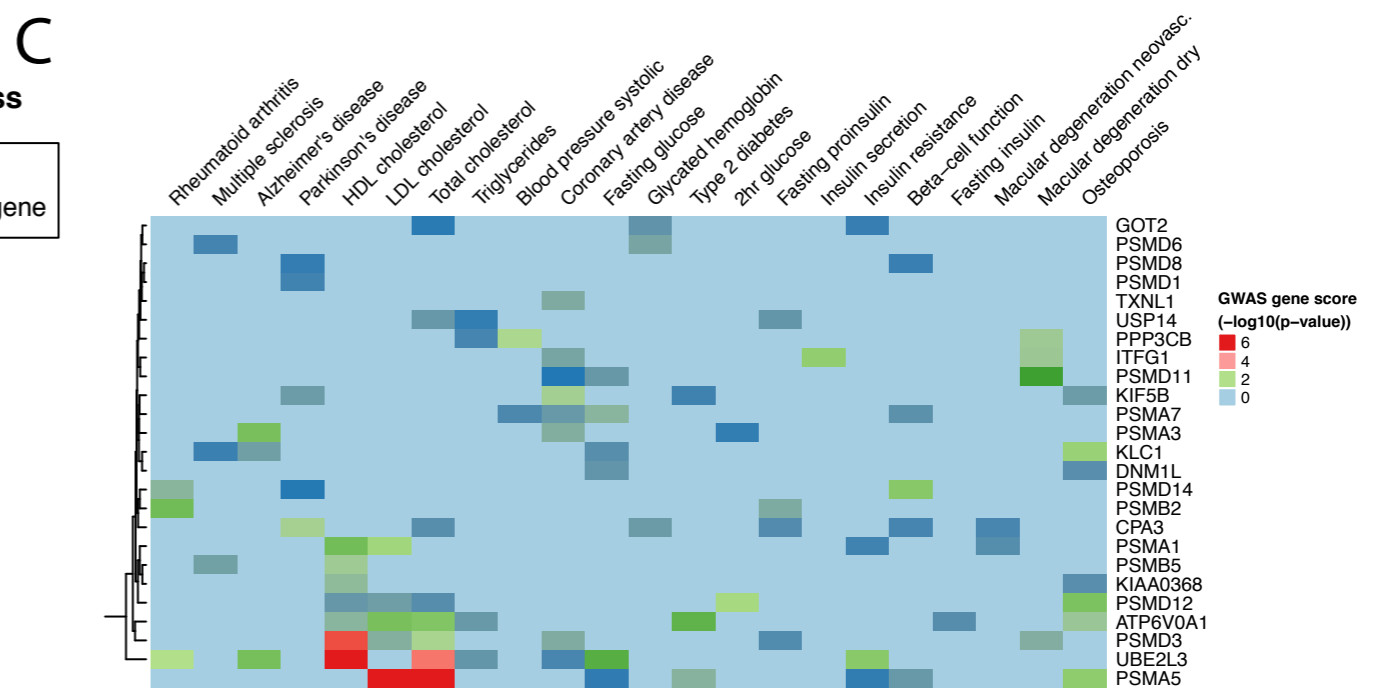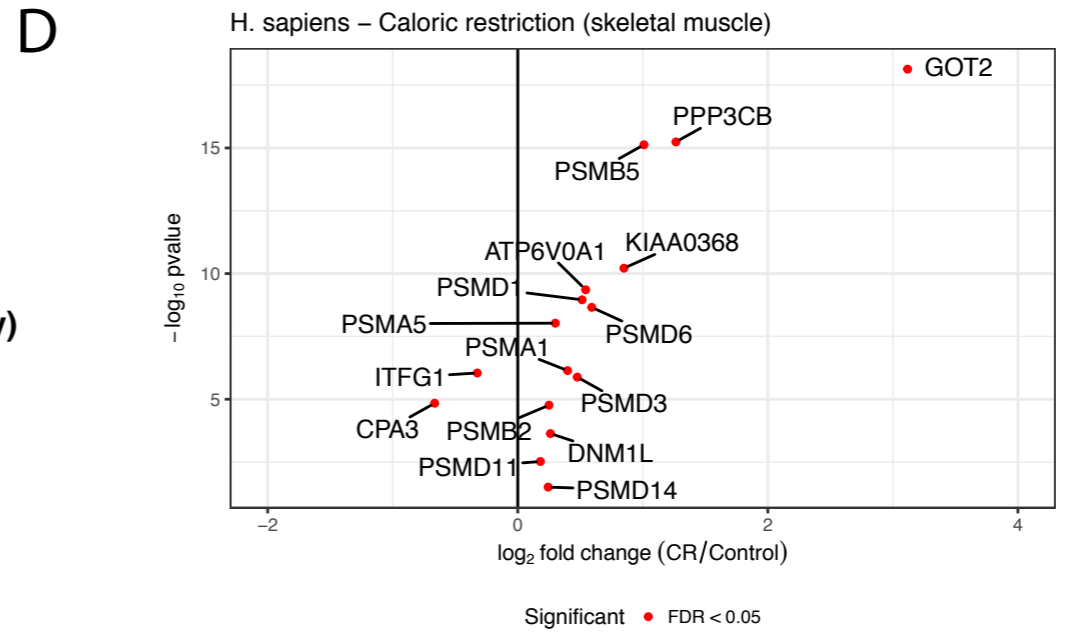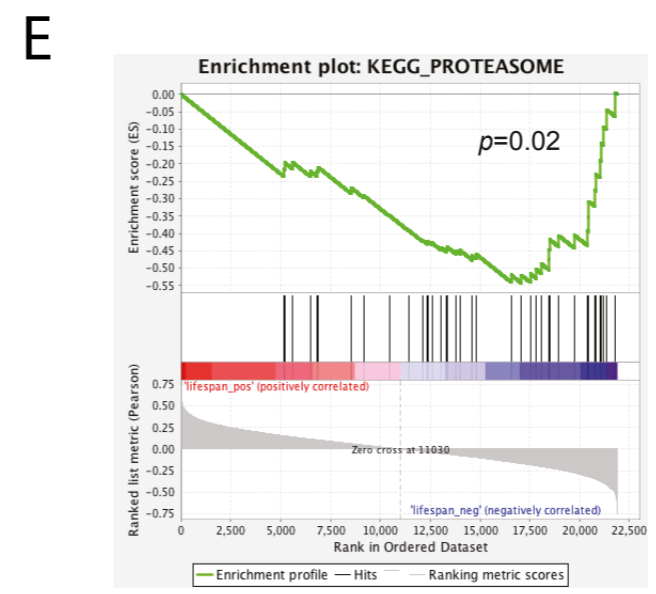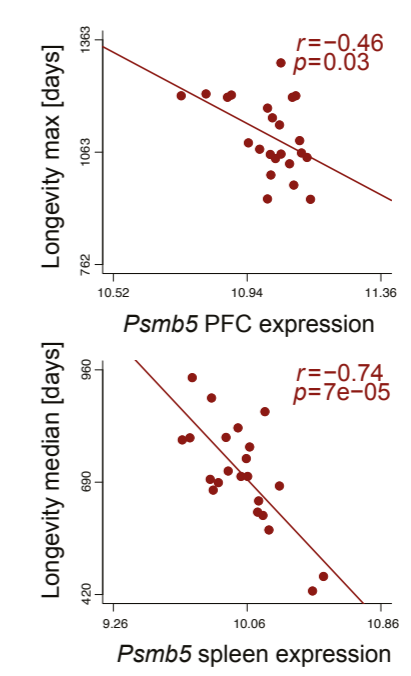

Source: https://www.biorxiv.org/content/10.1101/287128v2.full.pdf
